# Supplementary material
Source: PubMed Central journal article supplement (PMC11433069)
Supplement: NIHMS1959898-supplement-SM.pdf [file NIHMS1959898-supplement-SM.pdf]

Supplementary Materials for  
**Ikaros is a principal regulator of Aire<sup>+</sup> mTEC homeostasis, thymic mimetic cell diversity, and central tolerance**

Jun Hyung Sin *et al.*

Corresponding author: Michael R. Waterfield, michael.waterfield@ucsf.edu

*Sci. Immunol.* **8**, eabq3109 (2023)  
DOI: 10.1126/sciimmunol.abq3109

**The PDF file includes:**

Figs. S1 to S15  
Table S1  
Legends for data S1 to S3

**Other Supplementary Material for this manuscript includes the following:**

Data S1 to S3  
MDAR Reproducibility Checklist

Figure S1

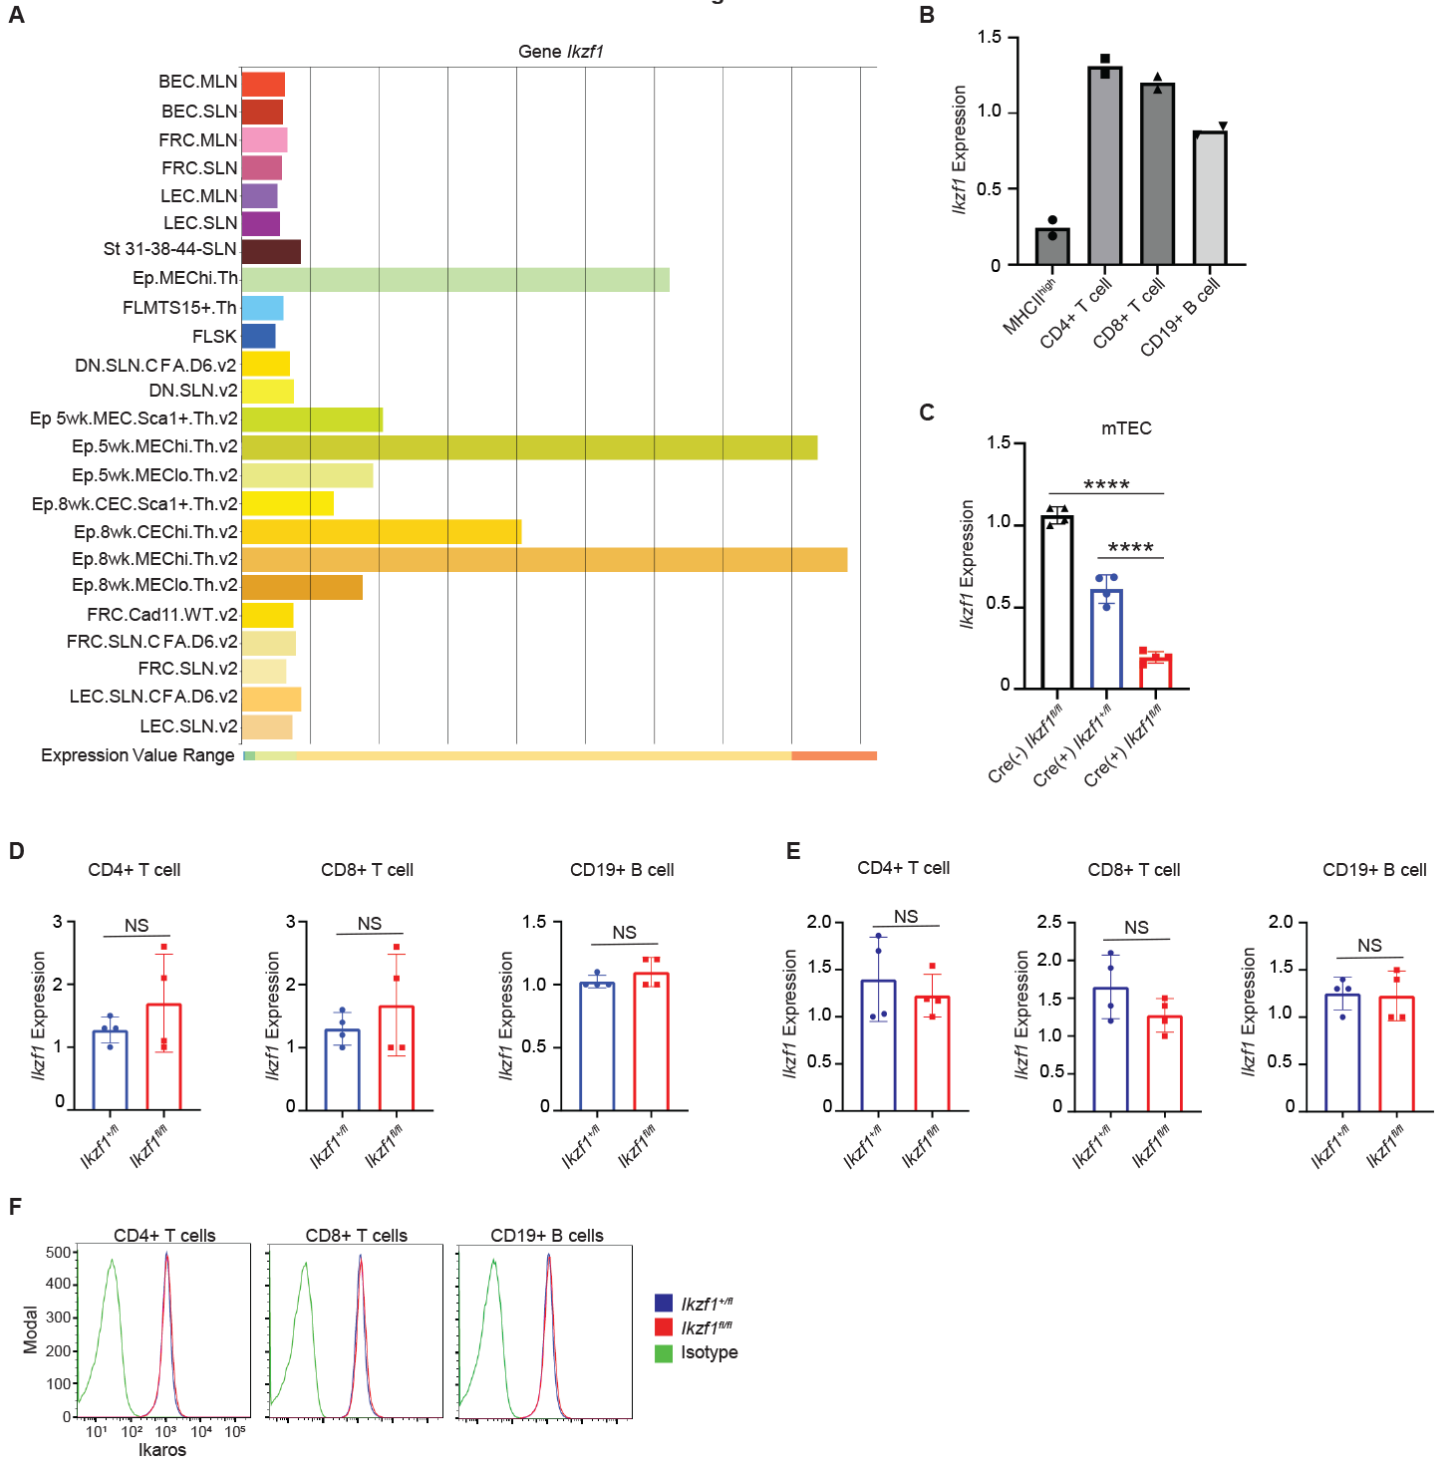

**Fig. S1 – *Izkf1* is efficiently deleted in *Foxn1*-Cre/*Izkf1*<sup>fl/fl</sup> mTECs.** (A) Relative expression of *Izkf1* mRNA in stromal cells. Downloaded from the Immgen expression database. *Izkf1* is highly expressed in medullary thymic epithelial cells (MEC<sup>hi</sup>). (B) Relative expression of *Izkf1* mRNA in sorted MHC-II<sup>high</sup> mTECs and lymph node CD4<sup>+</sup> T cells, CD8<sup>+</sup> T cells, and CD19<sup>+</sup> B cells from C57BL/6 mice. (C) Relative expression of *Izkf1* mRNA in sorted MHC-II<sup>high</sup> mTECs from *Foxn1*-Cre(-)/*Izkf1*<sup>fl/fl</sup>, *Foxn1*-Cre(+)/*Izkf1*<sup>+/fl</sup>, and *Foxn1*-Cre(+)/*Izkf1*<sup>fl/fl</sup> mice. (n = 4 mice per genotype). (D) Relative expression of *Izkf1* mRNA in sorted lymph node CD4<sup>+</sup> T cells, CD8<sup>+</sup> T cells, and CD19<sup>+</sup> B cells from *Foxn1*-Cre/*Izkf1*<sup>fl/fl</sup> (*Izkf1*<sup>fl/fl</sup>) and *Foxn1*-Cre/*Izkf1*<sup>+/fl</sup> (*Izkf1*<sup>+/fl</sup>) mice. (n = 4 mice per genotype). (E) Relative expression of *Izkf1* mRNA in sorted splenic CD4<sup>+</sup> T cells, CD8<sup>+</sup> T cells, and CD19<sup>+</sup> B cells. (n = 4 mice per genotype). (F) Representative flow cytometry plots of Ikaros levels in splenic CD4<sup>+</sup> T cells, CD8<sup>+</sup> T cells and CD19<sup>+</sup> B cells. (B-E) In graphs, the bar corresponds to

the mean, with error bars showing +/- SD of values shown, and each data point represents an individual mouse. **(C)** Statistical significance was calculated using one-way ANOVA and grouped comparisons were corrected using Tukey's multiple-comparison test, \*\*\*\* $P < 0.0001$ . **(D, E)** Statistical significance was determined using Student's T-test. NS = not significant.

Figure S2

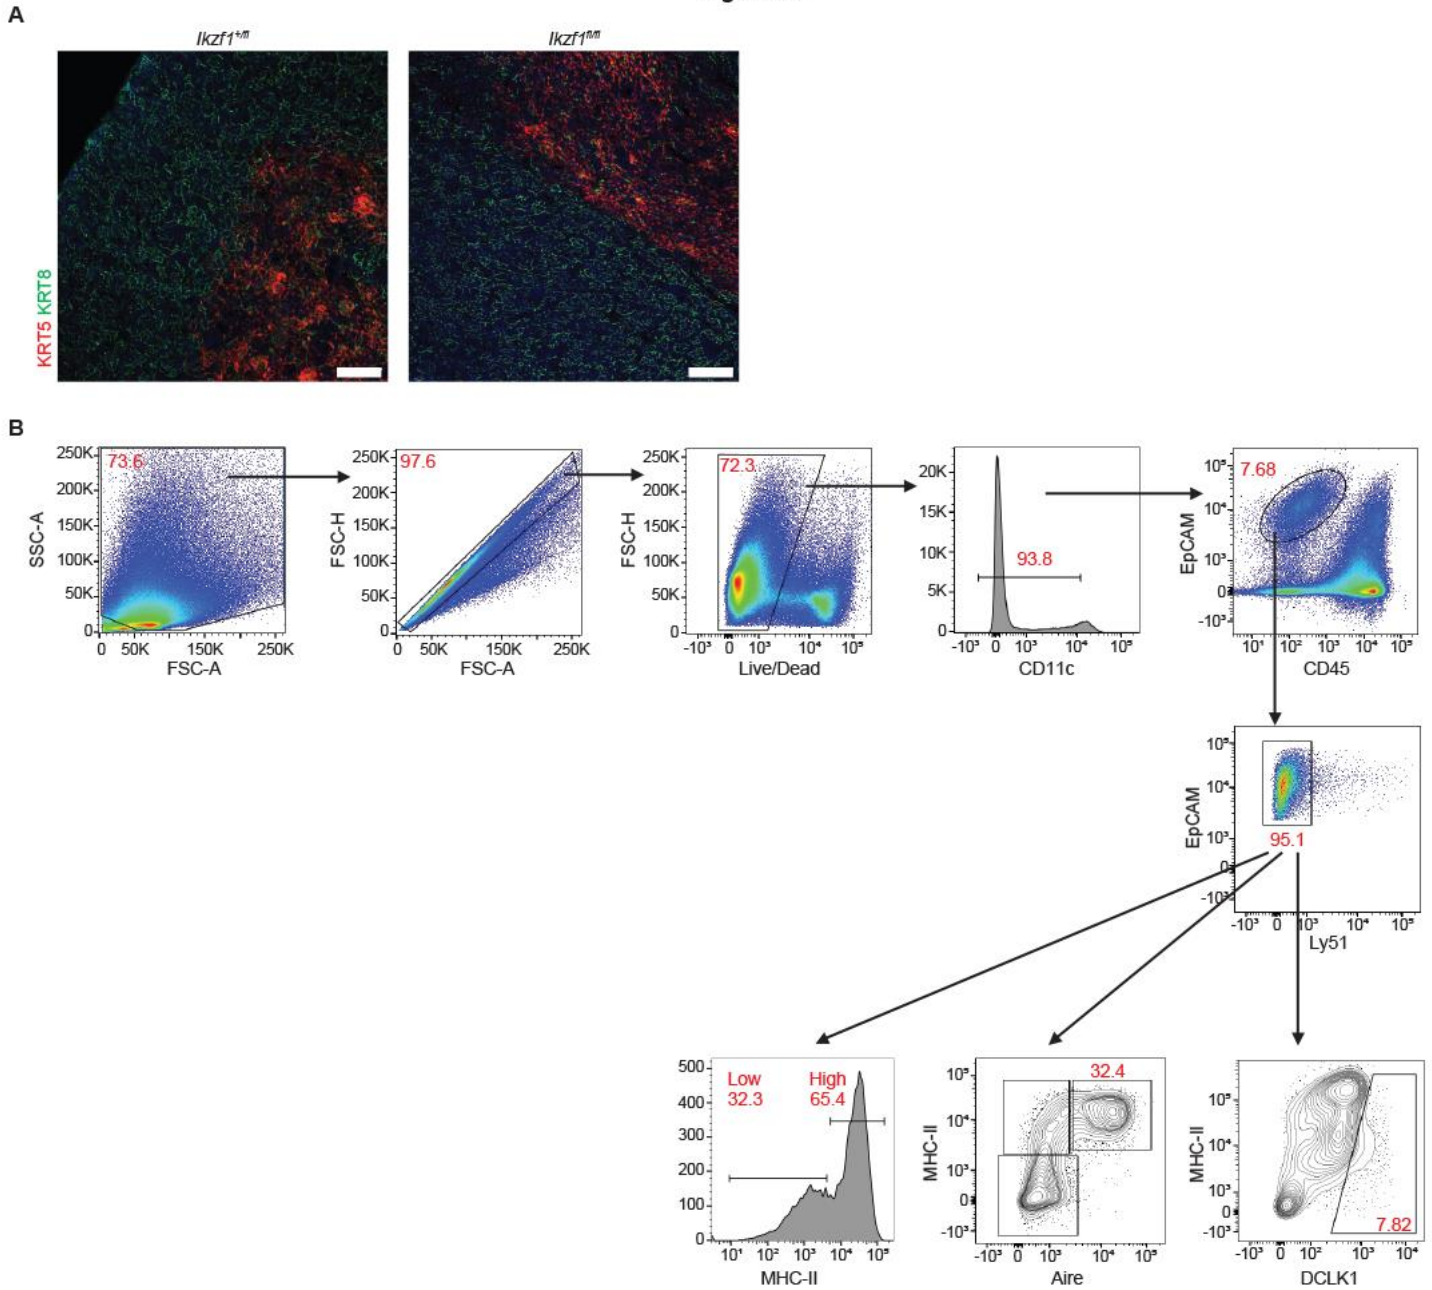

**Fig. S2 – Deletion of *Ikzf1* does not alter thymic architecture.** (A) Confocal microscopy of Keratin 5 (KRT5) (red) and Keratin 8 (KRT8) (green) of 30-day old thymi from *Foxn1-Cre(+)/Ikzf1<sup>+/fl</sup>* (*Ikzf1<sup>+/fl</sup>*) mice and *Foxn1-Cre(+)/Ikzf1<sup>fl/fl</sup>* (*Ikzf1<sup>fl/fl</sup>*) mice. Scale bars = 100  $\mu$ m. (B) Flow cytometry gating strategy for the isolation CD11c<sup>+</sup>EPCAM<sup>+</sup> CD45<sup>+</sup>LY51<sup>+</sup>IA<sup>b+</sup>Aire<sup>+</sup> mTECs and CD11c<sup>+</sup>EPCAM<sup>+</sup> CD45<sup>+</sup>LY51<sup>+</sup>IA<sup>b+</sup>DCLK1<sup>+</sup> thymic tuft cells.

**Figure S3**

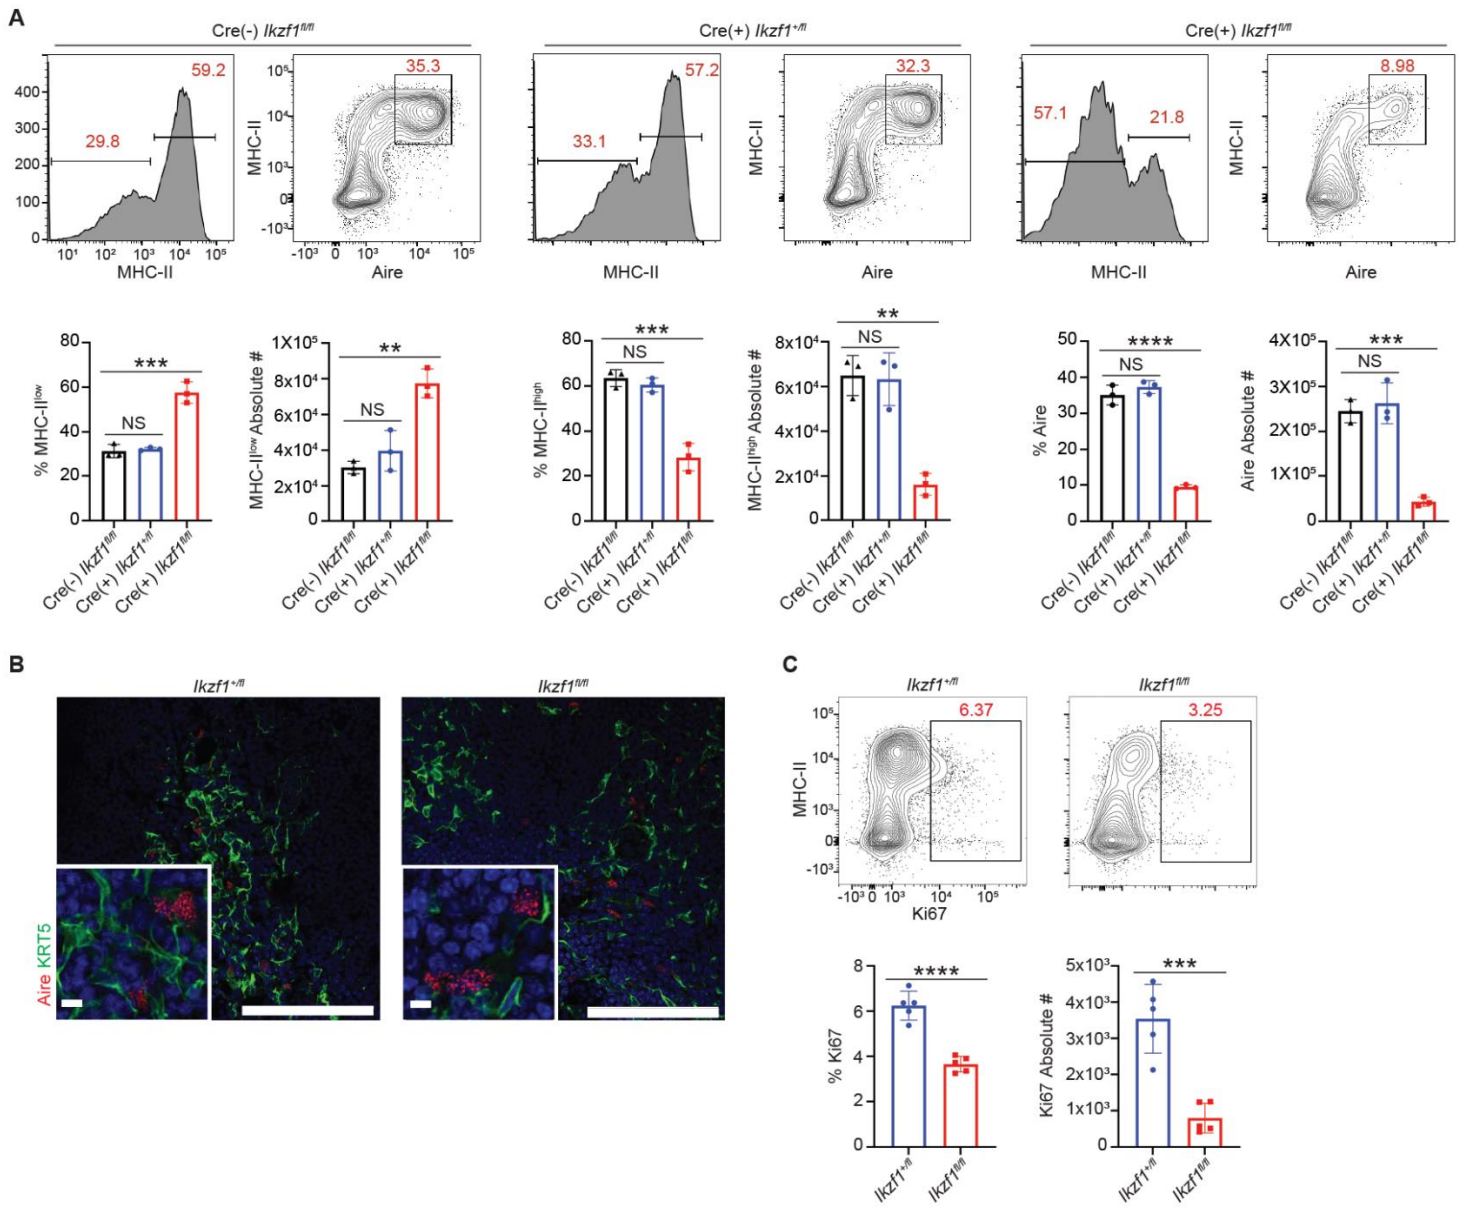

**Fig. S3 – *Foxn1*-Cre(+)/*Ikzf1*<sup>+/fl</sup> and *Foxn1*-Cre(-)/*Ikzf1*<sup>fl/fl</sup> mice are phenotypically indistinguishable. (A)** Flow cytometry (left) and percentage and absolute number (right) of CD11c<sup>+</sup>EPCAM<sup>+</sup>CD45<sup>-</sup>LY51<sup>-</sup>MHC-II<sup>high</sup>, MHC-II<sup>low</sup>, and Aire<sup>+</sup> mTECs from *Foxn1*-Cre(-)/*Ikzf1*<sup>fl/fl</sup> mice, *Foxn1*-Cre(+)/*Ikzf1*<sup>+/fl</sup> mice, and *Foxn1*-Cre(+)/*Ikzf1*<sup>fl/fl</sup> mice. (n = 3 mice per genotype). **(B)** Confocal microscopy of Aire (red) and KRT5 (green) from 30-day old thymi. Scale bars = 100 μm and 20 μm for inset. **(C)** Flow cytometry (left) and percentage and absolute number (right) of CD11c<sup>+</sup>EPCAM<sup>+</sup> CD45<sup>-</sup>LY51<sup>-</sup>IA<sup>b+</sup>Ki67<sup>+</sup> mTECs. (n = 5 mice per genotype). **(A and C)** In graphs, the bar corresponds to the mean, with error bars showing +/- SD of values shown, and each data point represents an individual mouse. **(A)** Statistical significance was calculated using one-way ANOVA and grouped comparisons were corrected using Tukey's multiple-comparison test, \*\*P<0.01, \*\*\*P<0.001, \*\*\*\*P<0.0001. NS = not significant. **(C)** Statistical significance was determined using Student's T-test, \*\*\*P<0.001, \*\*\*\*P<0.0001.

Figure S4

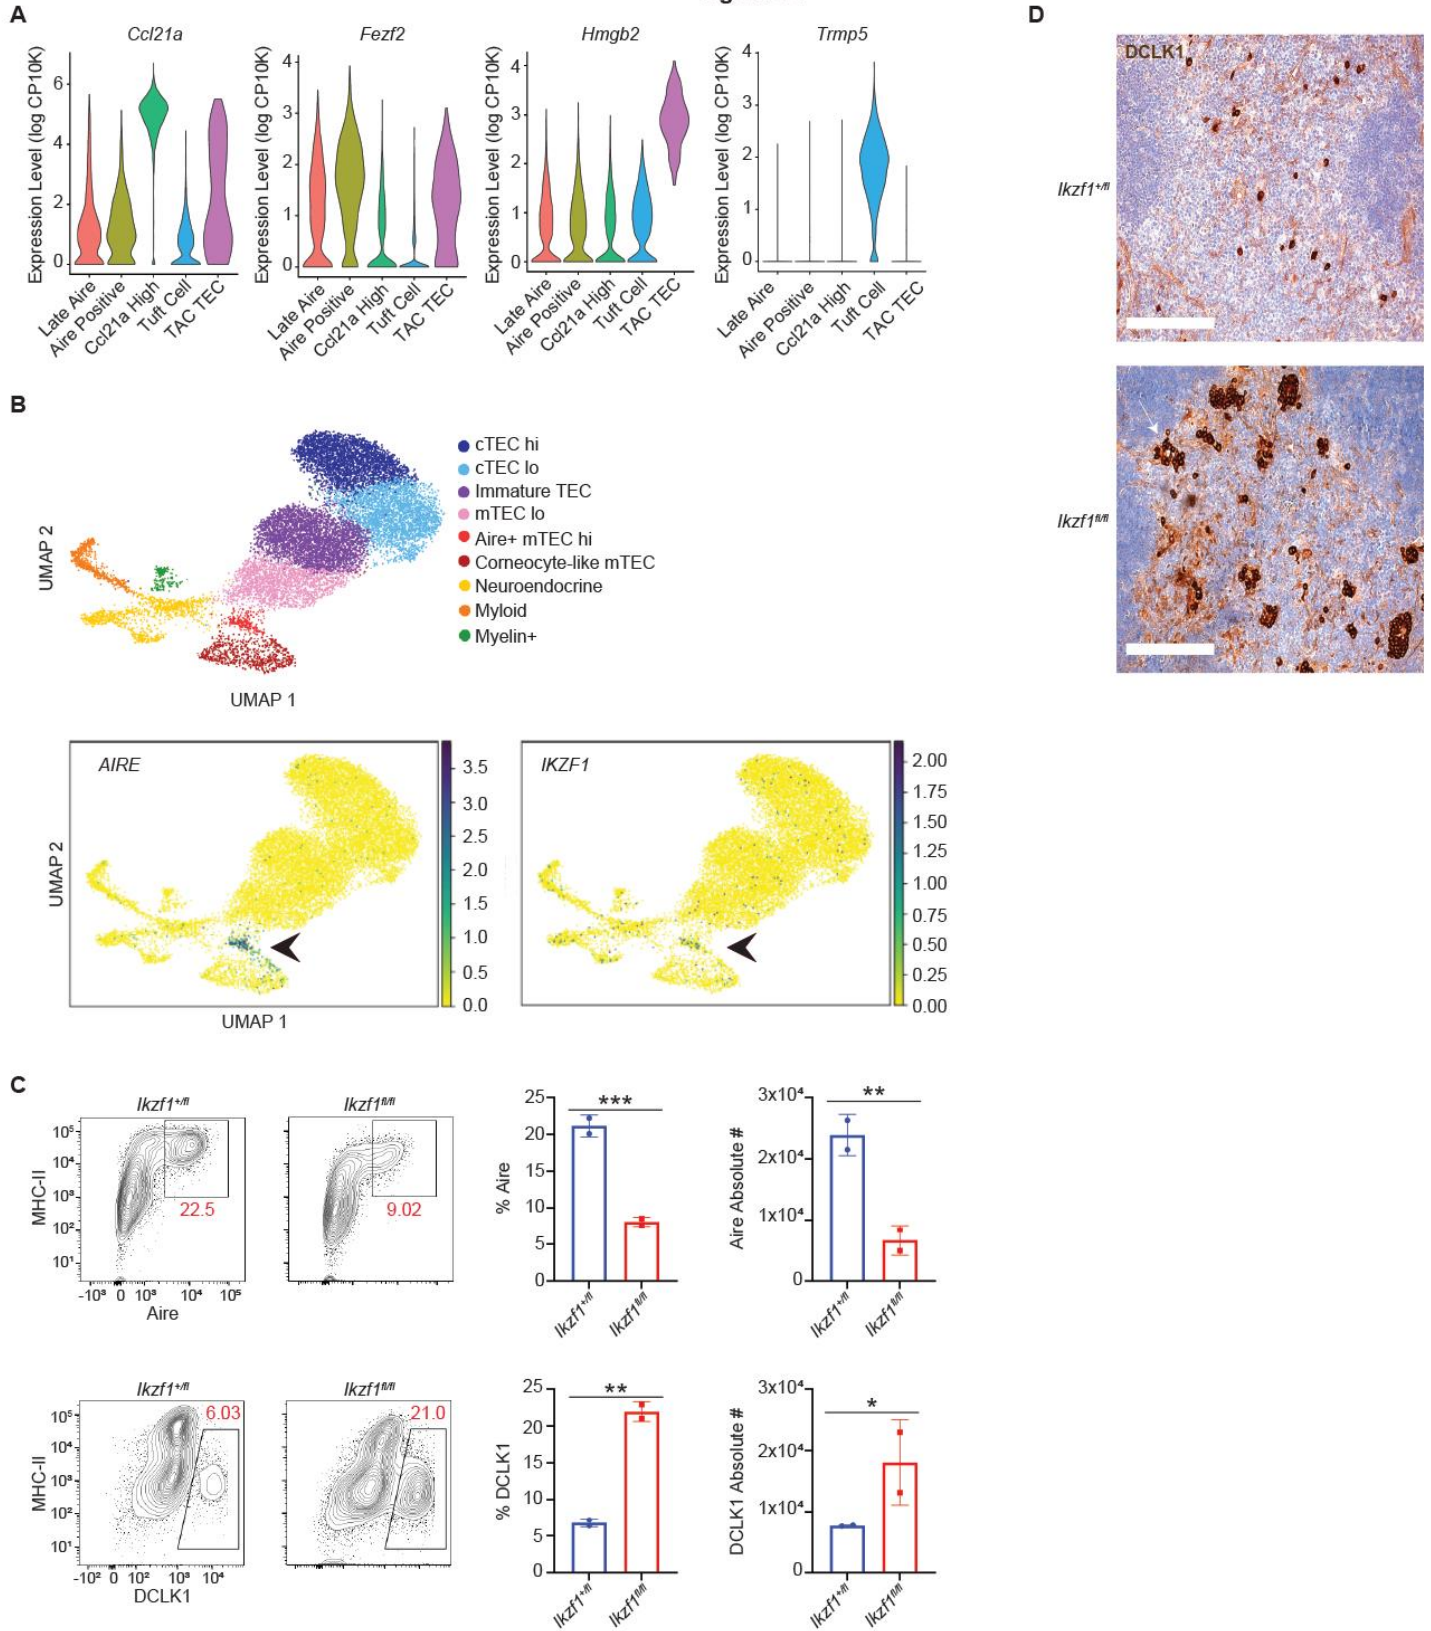

**Fig. S4 – IKZF1 is present in human mTECs.** (A) Violin plots of marker genes for specific mTEC subsets from murine scRNA-seq data. (B) UMAPs of scRNA-seq data from human thymic epithelial cells. Arrows denote the mTEC subset with increased *AIRE* and *IKZF1* expression. (C) Flow cytometry (left) and percentage and absolute number of CD11c<sup>+</sup>EPCAM<sup>+</sup>CD45<sup>-</sup>LY51<sup>-</sup>Aire<sup>+</sup> and DCLK1<sup>+</sup> mTECs in 6-month-old *Foxn1-Cre/Ikzf1<sup>+/fl</sup>* mice and *Foxn1-Cre/Ikzf1<sup>fl/fl</sup>* mice. (n = 2 mice per genotype). (D) Representative

immunohistochemistry images of 30- day-old thymi stained with DCLK1 (5  $\mu$ m sections). Scale Bar = 100  $\mu$ m. (C) In graphs, the bar corresponds to the mean, with error bars showing +/- SD of values shown, and each data point represents an individual mouse. (C) Statistical significance was determined using Student's T-test. \*P<0.05, \*\*P<0.01, \*\*\*P<0.001.

Figure S5

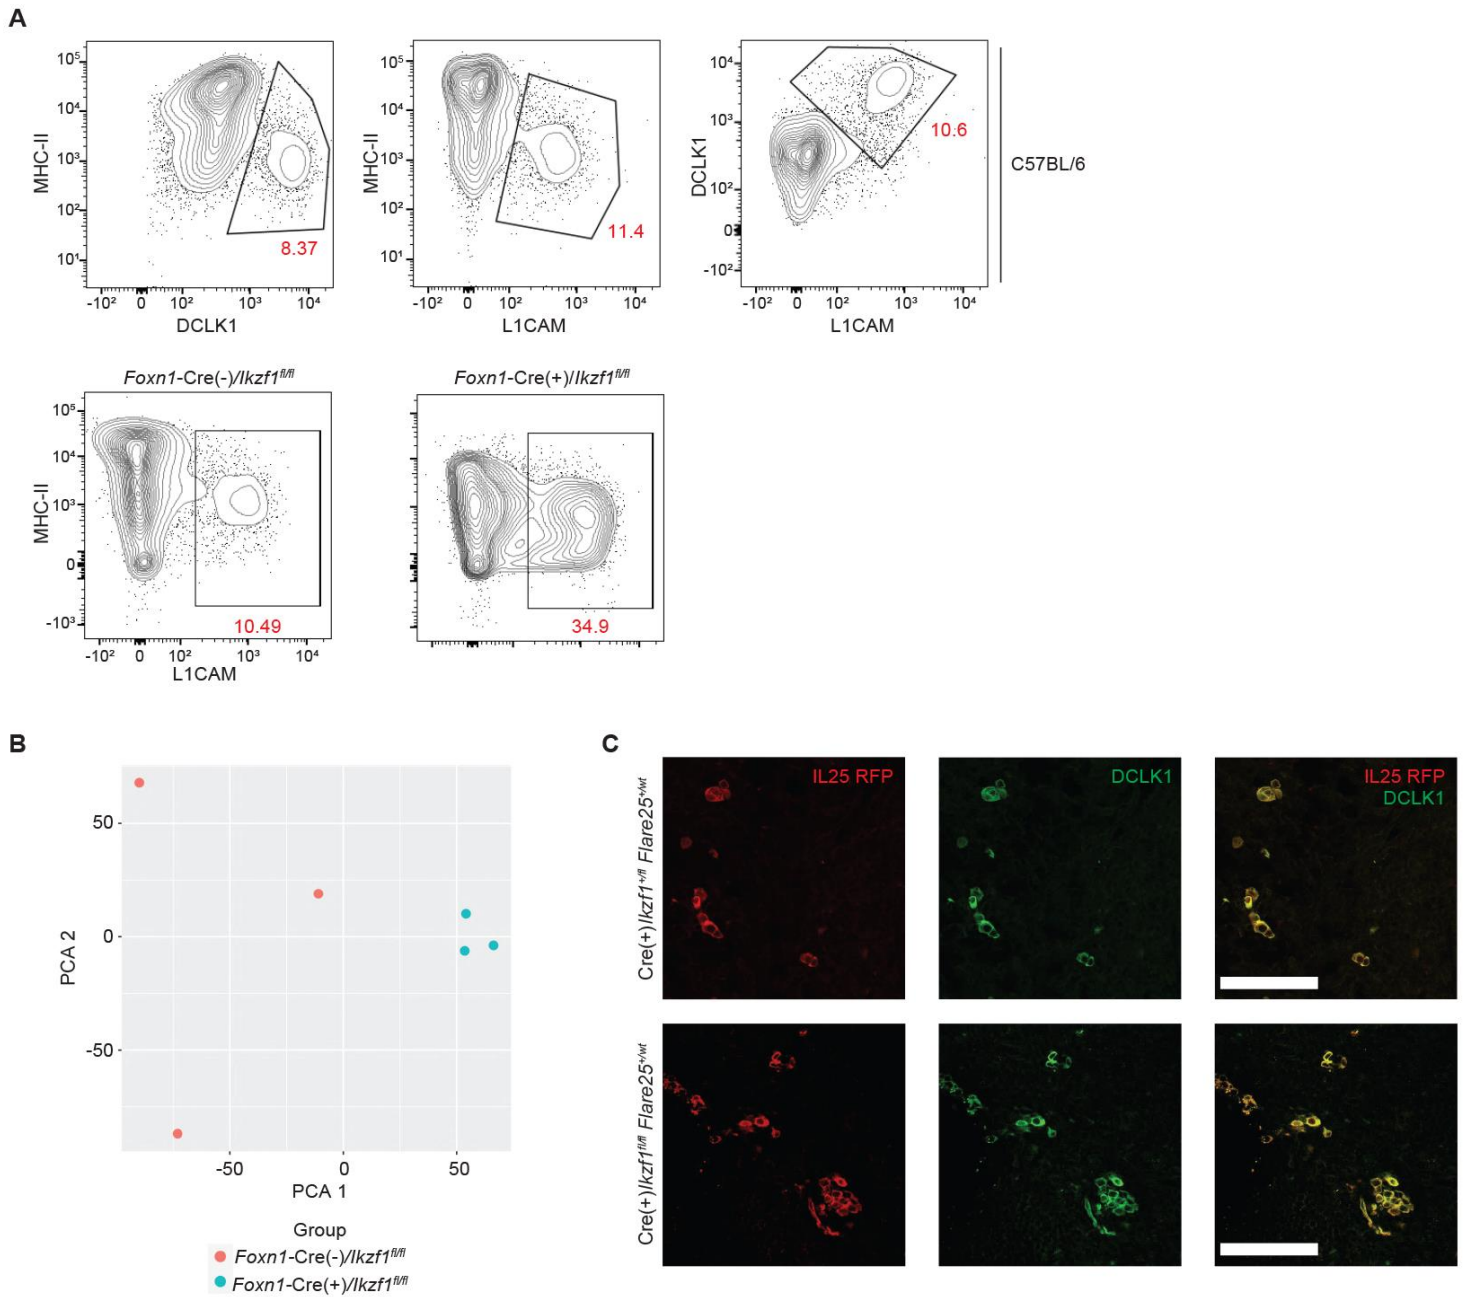

**Fig. S5 – Expression of DCLK1 and IL-25 overlap in tuft cells.** (A) Flow cytometry of CD11c<sup>+</sup>EPCAM<sup>+</sup>CD45<sup>-</sup>LY51<sup>-</sup>DCLK1<sup>+</sup> and CD11c<sup>+</sup>EPCAM<sup>+</sup>CD45<sup>-</sup>LY51<sup>-</sup>L1CAM<sup>+</sup> tuft cells in C57BL/6, *Foxn1-Cre(-)/Ikzf1<sup>fl/fl</sup>*, and *Foxn1-Cre(+)/Ikzf1<sup>fl/fl</sup>* mice. (B) Principal component analysis of bulk RNA-seq data from sorted L1CAM<sup>+</sup> tuft cells. Each data point represents tuft cells isolated from an individual mouse. (C) Representative confocal images (25  $\mu$ m sections) of IL25-RFP (red) and DCLK1 (green) from 30-day old thymi of the indicated genotype. Immunofluorescence (IF) staining of thymic slices at high (40X optical) magnification. Scale bars = 100  $\mu$ m.



Figure S6

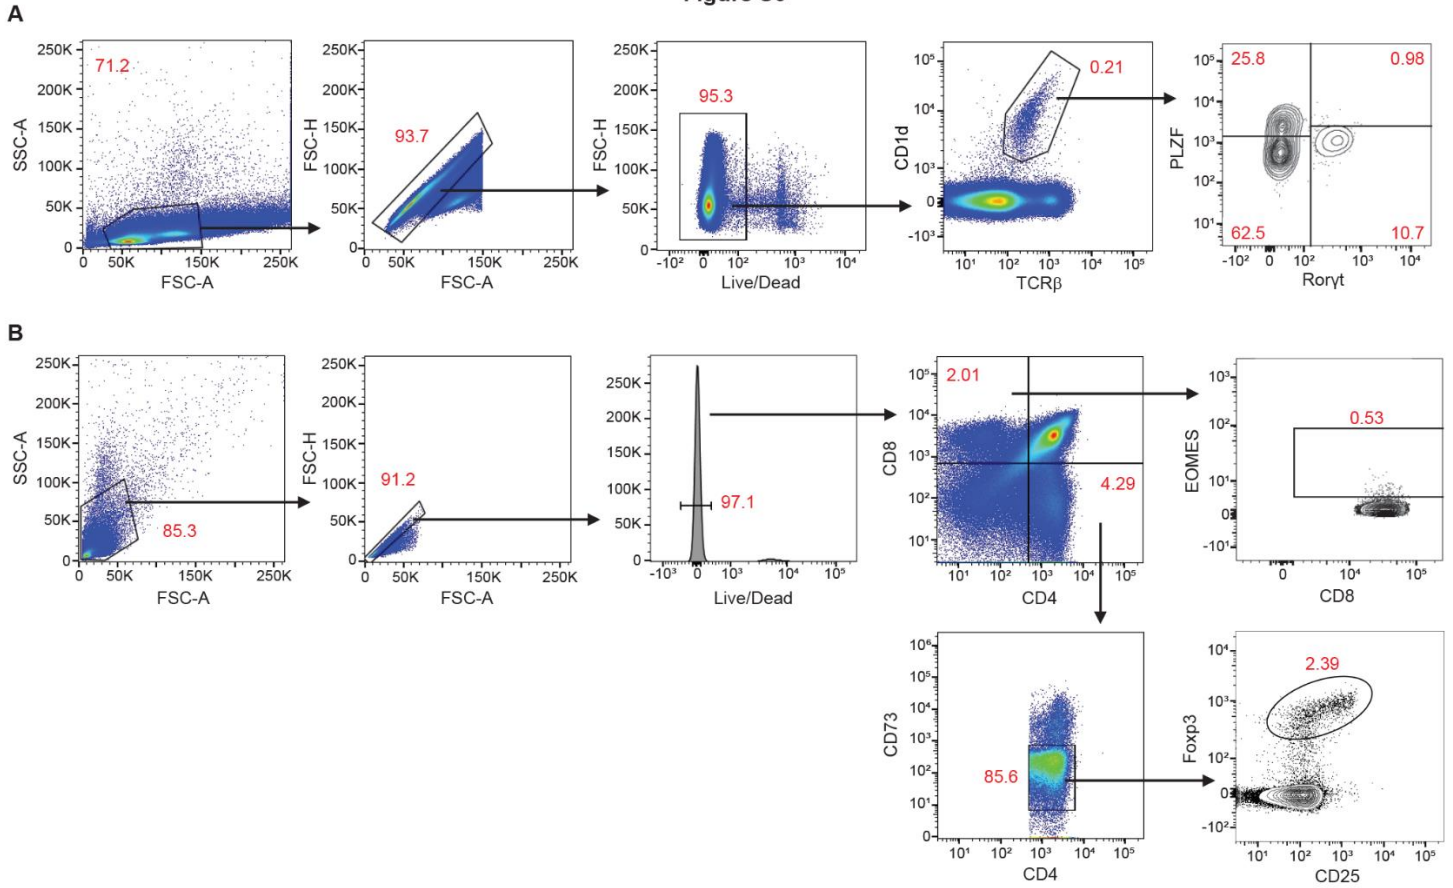

**Fig. S6 – Gating strategy for iNKT and CD8<sup>+</sup> EOMES panels. (A)** Representative flow cytometry gating strategy for two iNKT subsets: CD1d<sup>+</sup>PLZF1<sup>+</sup> iNKT2s and CD1d<sup>+</sup>RORγt<sup>+</sup> iNKT3s. **(B)** Representative flow cytometry gating strategy for CD8<sup>+</sup>EOMES<sup>+</sup> innate T cells and CD4<sup>+</sup>CD73<sup>-</sup>CD25<sup>+</sup>Fop3<sup>+</sup> Tregs.

Figure S7

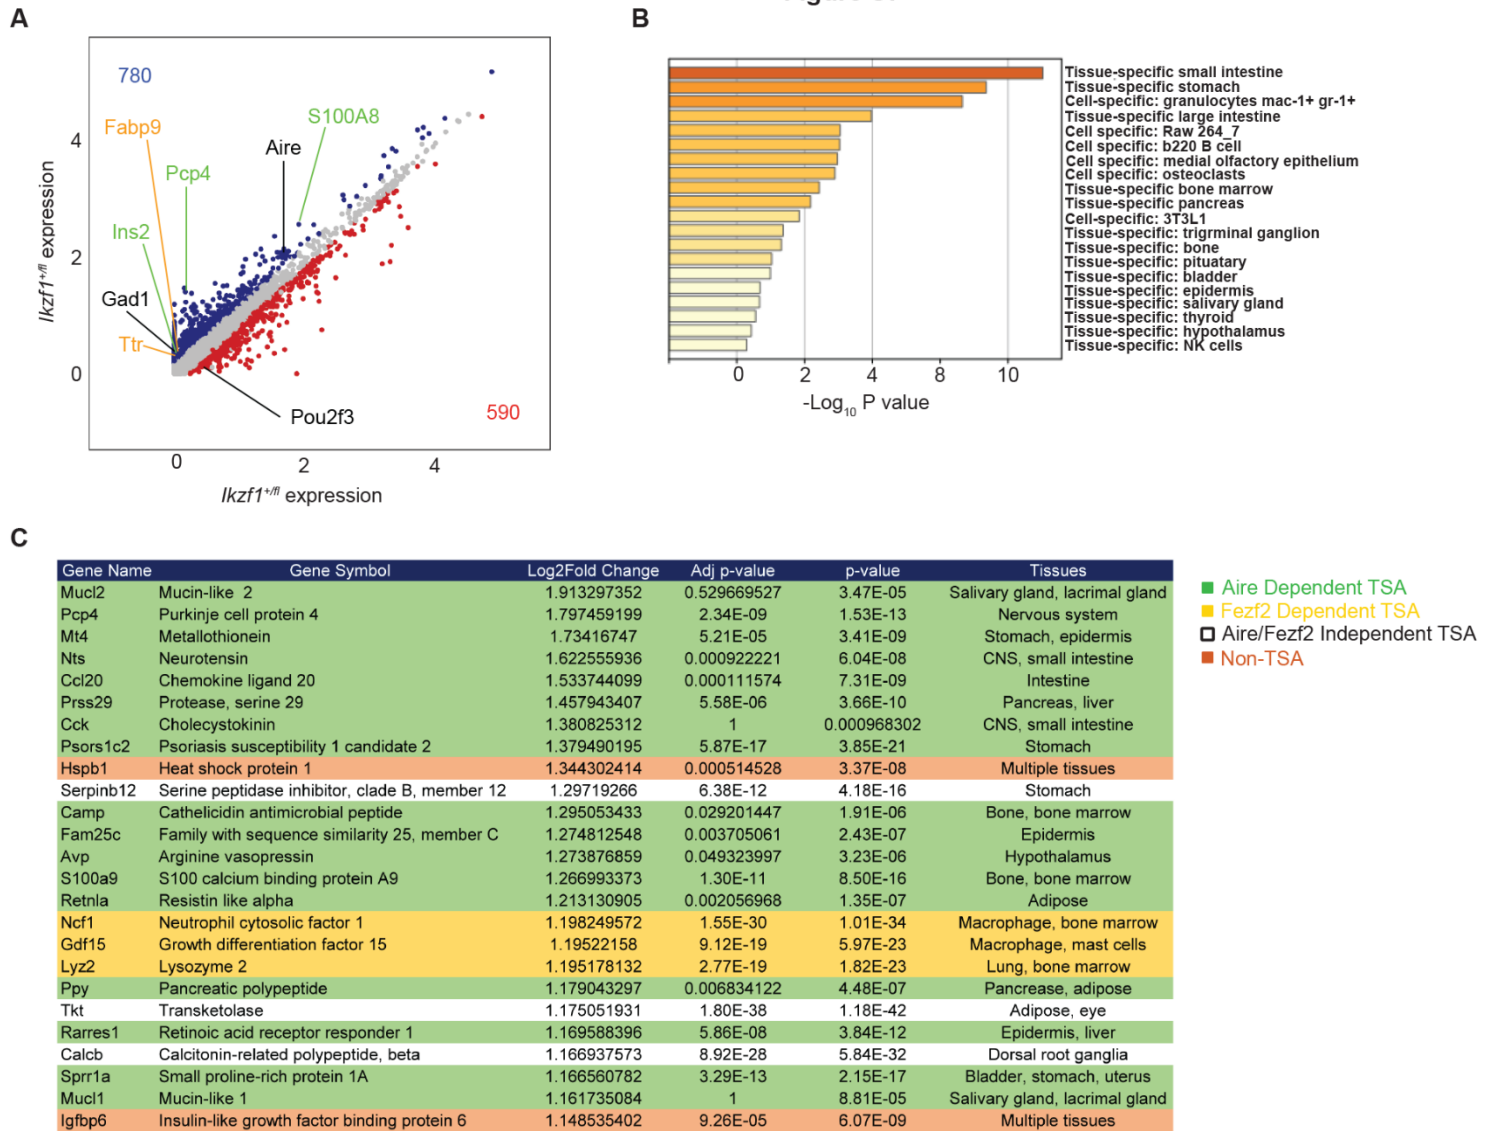

**Fig. S7 – scRNA-seq reveals that *Ikzf1*-deletion results in decreased TSA gene expression. (A)** Gene expression in *Foxn1*-Cre/*Ikzf1*<sup>+/*fl*</sup> mice (*Ikzf1*<sup>+/*fl*</sup>) versus *Foxn1*-Cre/*Ikzf1*<sup>fl/*fl*</sup> mice (*Ikzf1*<sup>fl/*fl*</sup>) in Aire<sup>+</sup> mTECs. Blue numbers represent the number of genes increased in *Ikzf1*<sup>+/*fl*</sup> mTECs (log<sub>2</sub>FC>0.25, p<0.05) and red numbers equal the number of genes increased in *Ikzf1*<sup>fl/*fl*</sup> mTECs (log<sub>2</sub>FC>0.25, p<0.05). Genes labelled in green are Aire-dependent TSAs and genes labelled in orange are Fezf2-dependent TSA genes. **(B)** Metascape gene ontology analysis showing pathways downregulated in *Foxn1*-Cre/*Ikzf1*<sup>fl/*fl*</sup> Aire<sup>+</sup> mTECs. **(C)** Table of top 25 genes downregulated in *Ikzf1*<sup>fl/*fl*</sup> Aire<sup>+</sup> mTECs.

Figure S8

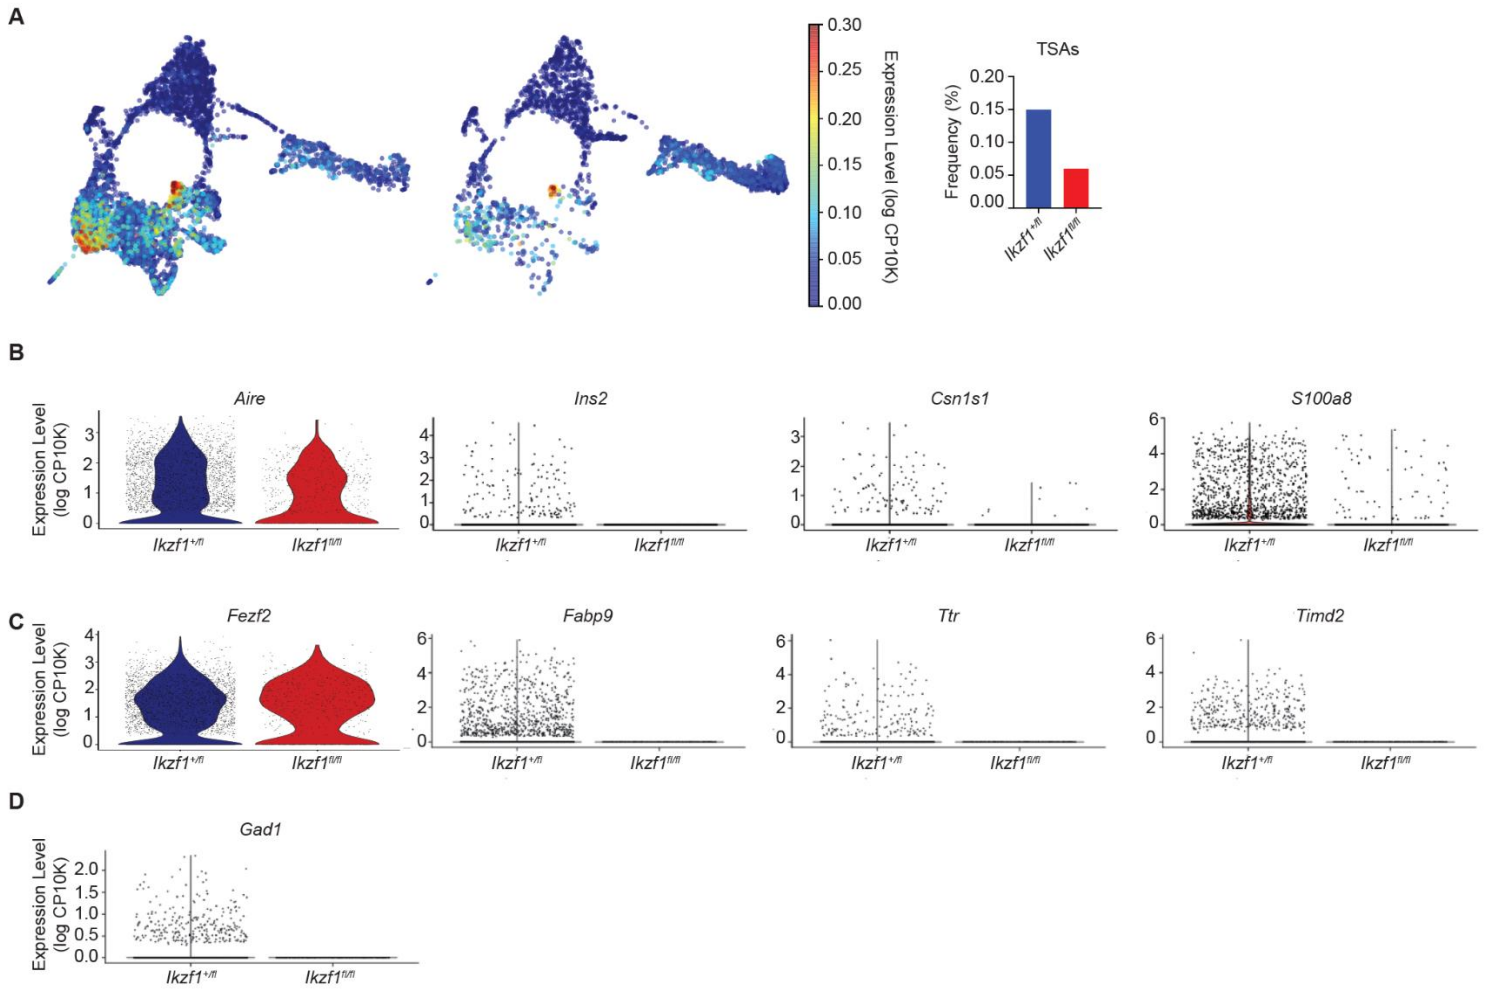

**Fig. S8 – Ikaros regulates TSA gene expression.** (A) UMAP visualization of the average expression of TSA genes. Bar graph shows the percentage of *Aire<sup>+</sup>* mTECs expressing TSA genes at an expression level of 0.15. (B) Violin plots for *Aire* and *Aire*-dependent TSA genes in *Aire<sup>+</sup>* mTECs. (C) Violin plots for *Fezf2* and *Fezf2*-dependent TSA genes in *Aire<sup>+</sup>* mTECs. (D) Violin plot for the *Aire/Fezf2*-independent TSA gene *Gad1* in *Aire<sup>+</sup>* mTECs.

Figure S9

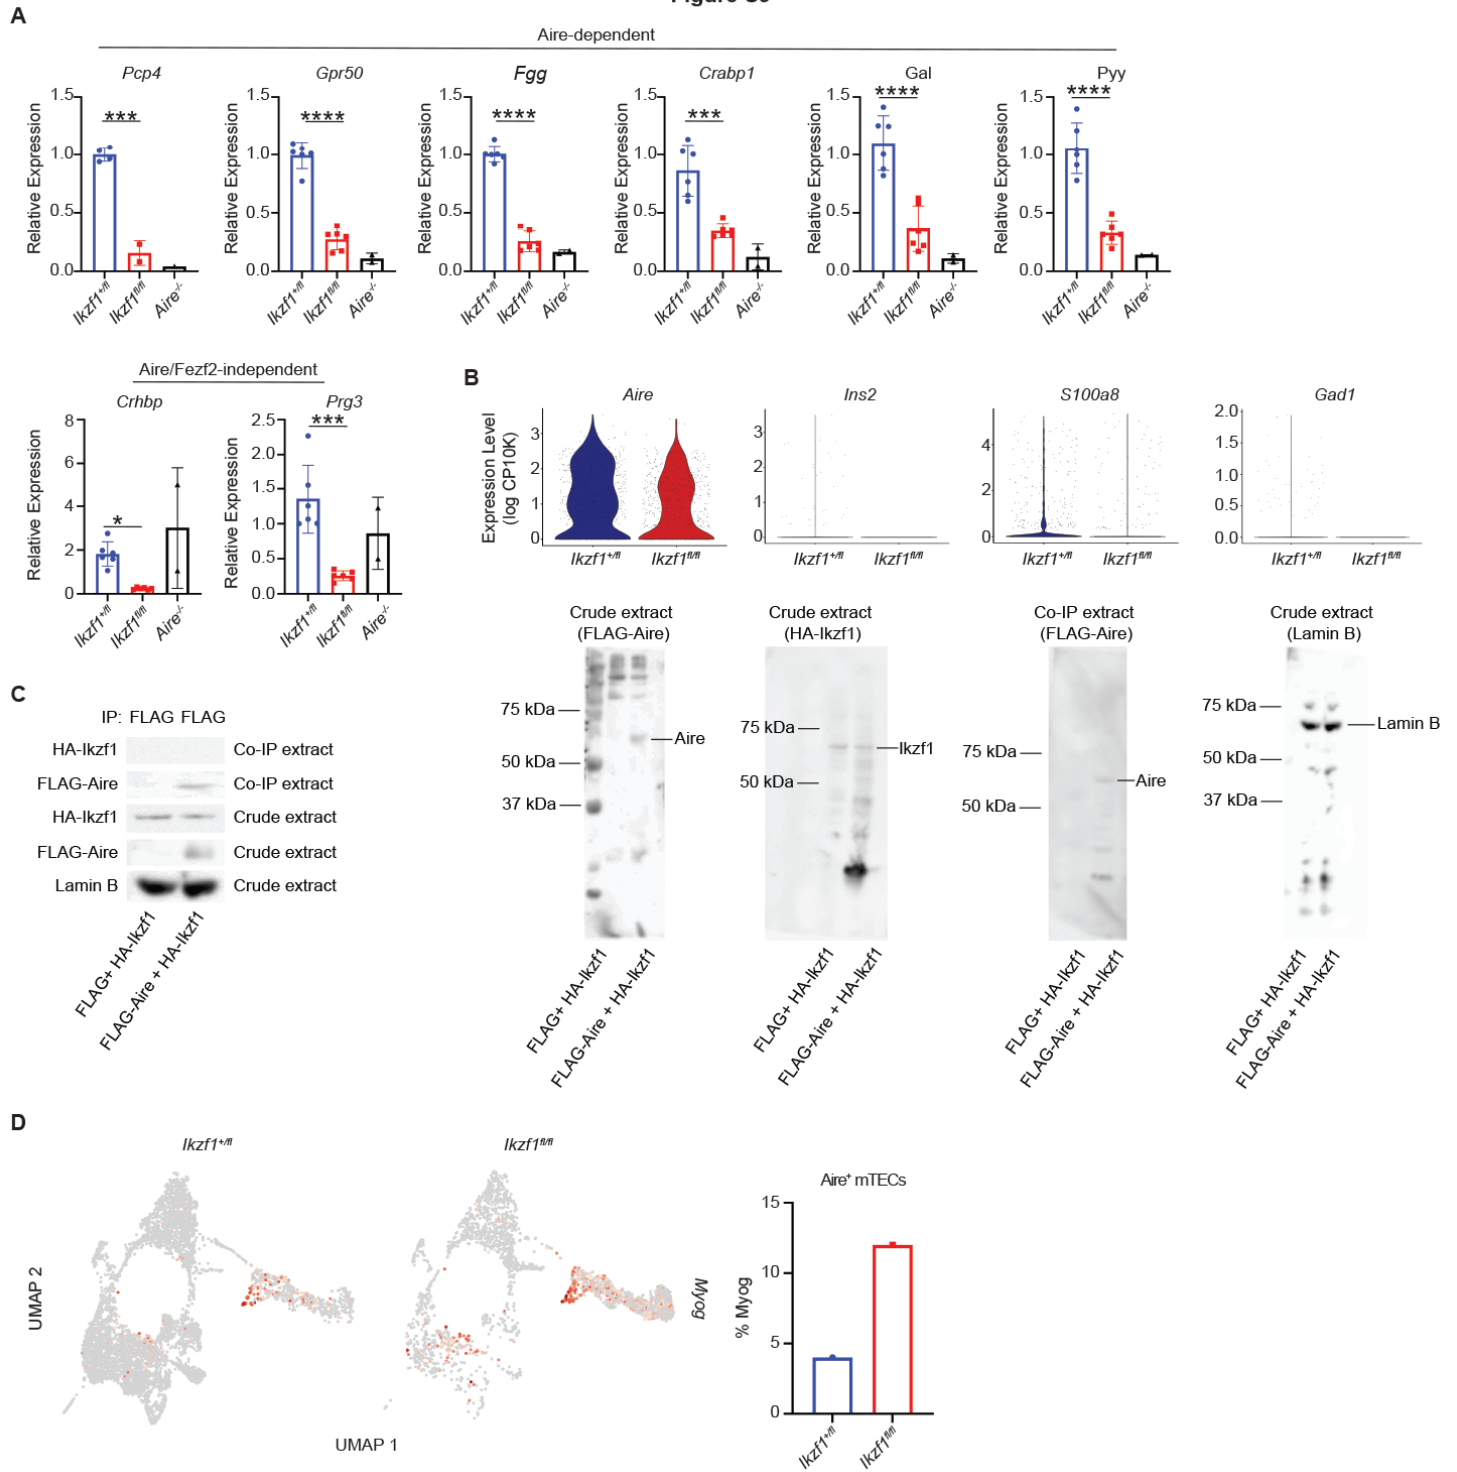

**Fig. S9 – Ikaros modulates TSA gene expression and Ikaros does not interact with Aire.** (A) qPCR of Aire-dependent and Aire/Fezf2-independent TSA gene expression. (n = 2 to 6 mice per genotype). (B) An equal number of Aire<sup>+</sup> mTECs were analyzed (downsampling) to control for cell number(s) differences between genotypes. Violin plots are shown for Aire and the indicated TSA genes. (C) 293T cells were co-transfected with plasmids expressing either FLAG and HA-Ikzf1 or FLAG-Aire and HA-Ikzf1. Coimmunoprecipitation (Co-IP) was performed with an anti-FLAG antibody and proteins were visualized by western blot. (D) UMAP of *Myog* expression in Aire<sup>+</sup> mTECs from scRNA-seq data. Bar graph represents the percentage of cells of each genotype expressing *Myog* in Aire<sup>+</sup> mTECs. (A) In graphs, the bar corresponds to the mean, with error bars showing +/- SD of values shown, and each data point represents an individual mouse. (A) Statistical

significance was calculated using one-way ANOVA and grouped comparisons were corrected using Tukey's multiple-comparison test, \* $P < 0.05$ , \*\*\* $P < 0.001$ , \*\*\*\* $P < 0.0001$ .

Figure S10

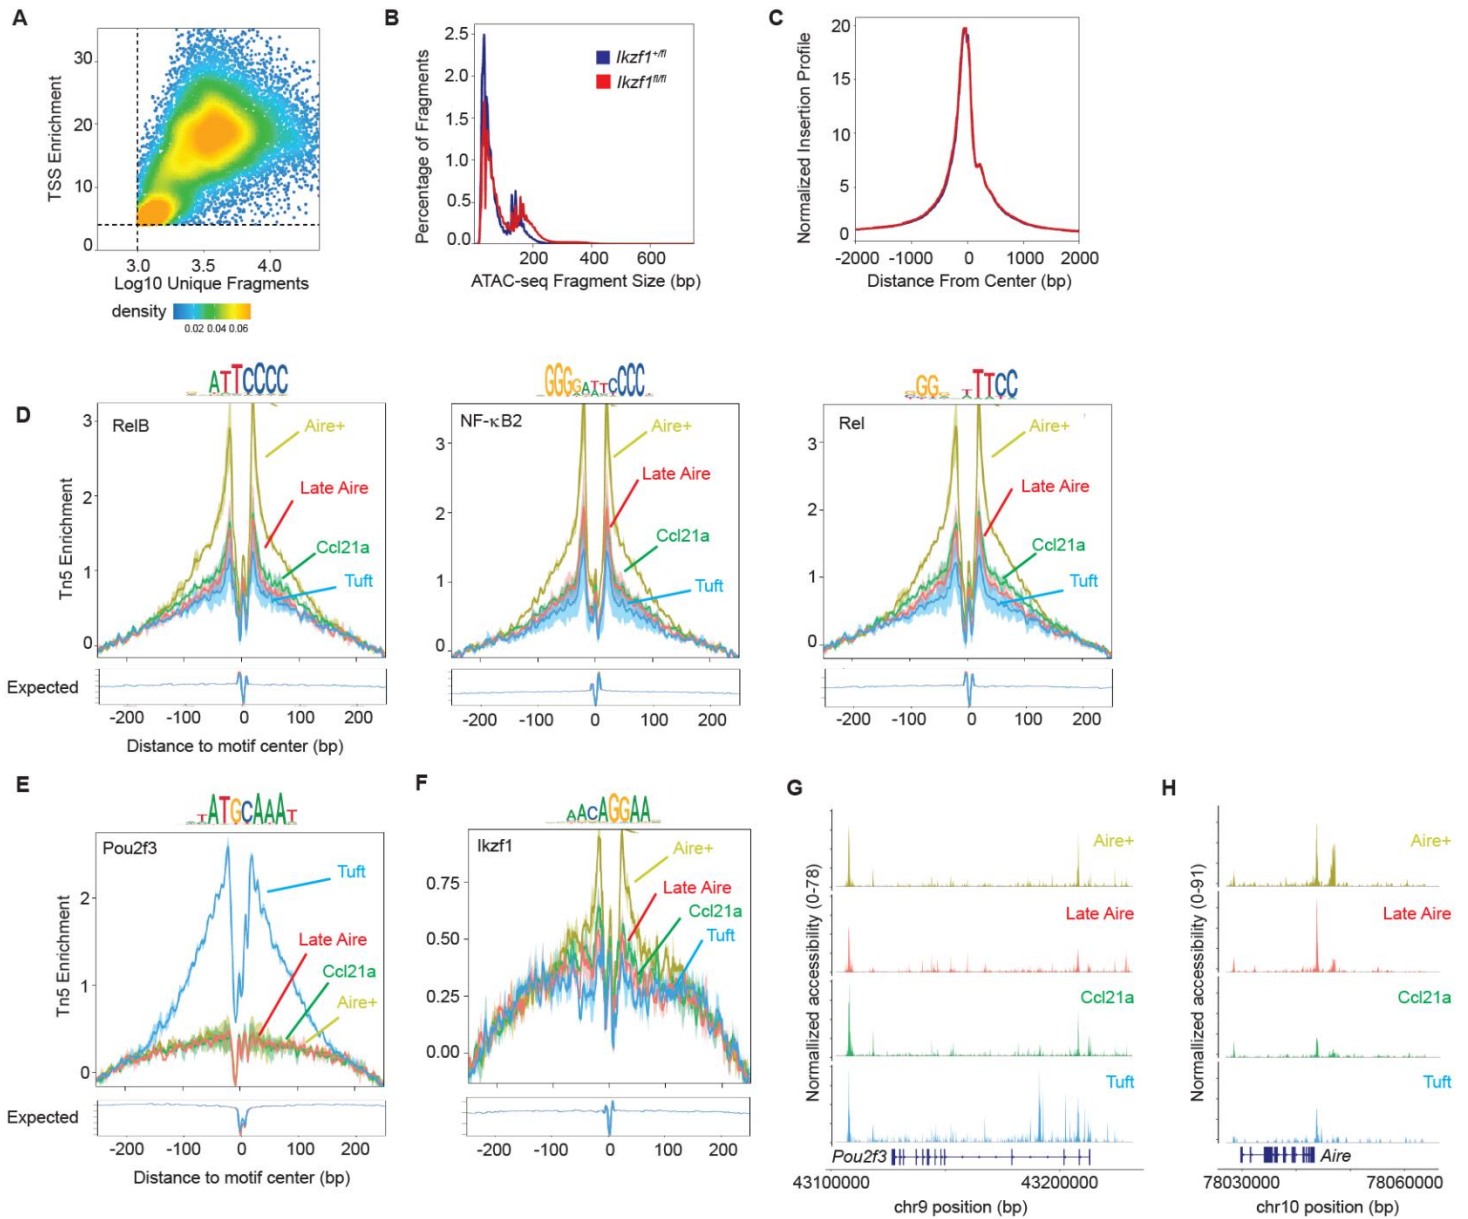

**Fig. S10 – scATAC-seq identified four mTEC subsets: Aire<sup>+</sup> mTECs, Late Aire mTECs, Ccl21a mTECs, and tuft cells.** (A to C) scATAC-seq data quality control. (A) Number of unique nuclear fragments versus the transcriptional start site (TSS) enrichment of all fragments. (B) Percentage of fragments versus the ATAC-seq fragment size for each genotype (*Foxn1-Cre/Ikzf1<sup>+fl</sup>* (*Ikzf1<sup>+fl</sup>*) versus *Foxn1-Cre/Ikzf1<sup>fl/fl</sup>* (*Ikzf1<sup>fl/fl</sup>*) mTECs). (C) Normalized TSS enrichment score profile for each genotype. (D to F) TF footprints with motifs for each mTEC subset. Expected Tn5 insertion shown below. (D) TF footprints for select *NF-κB* family members, (E) *Pou2f3*, and (F) *Ikzf1*. (G) Genome track of pseudobulk scATAC-seq for the *Pou2f3* locus. (H) Genome track of pseudobulk scATAC-seq for the *Aire* locus.

Figure S11

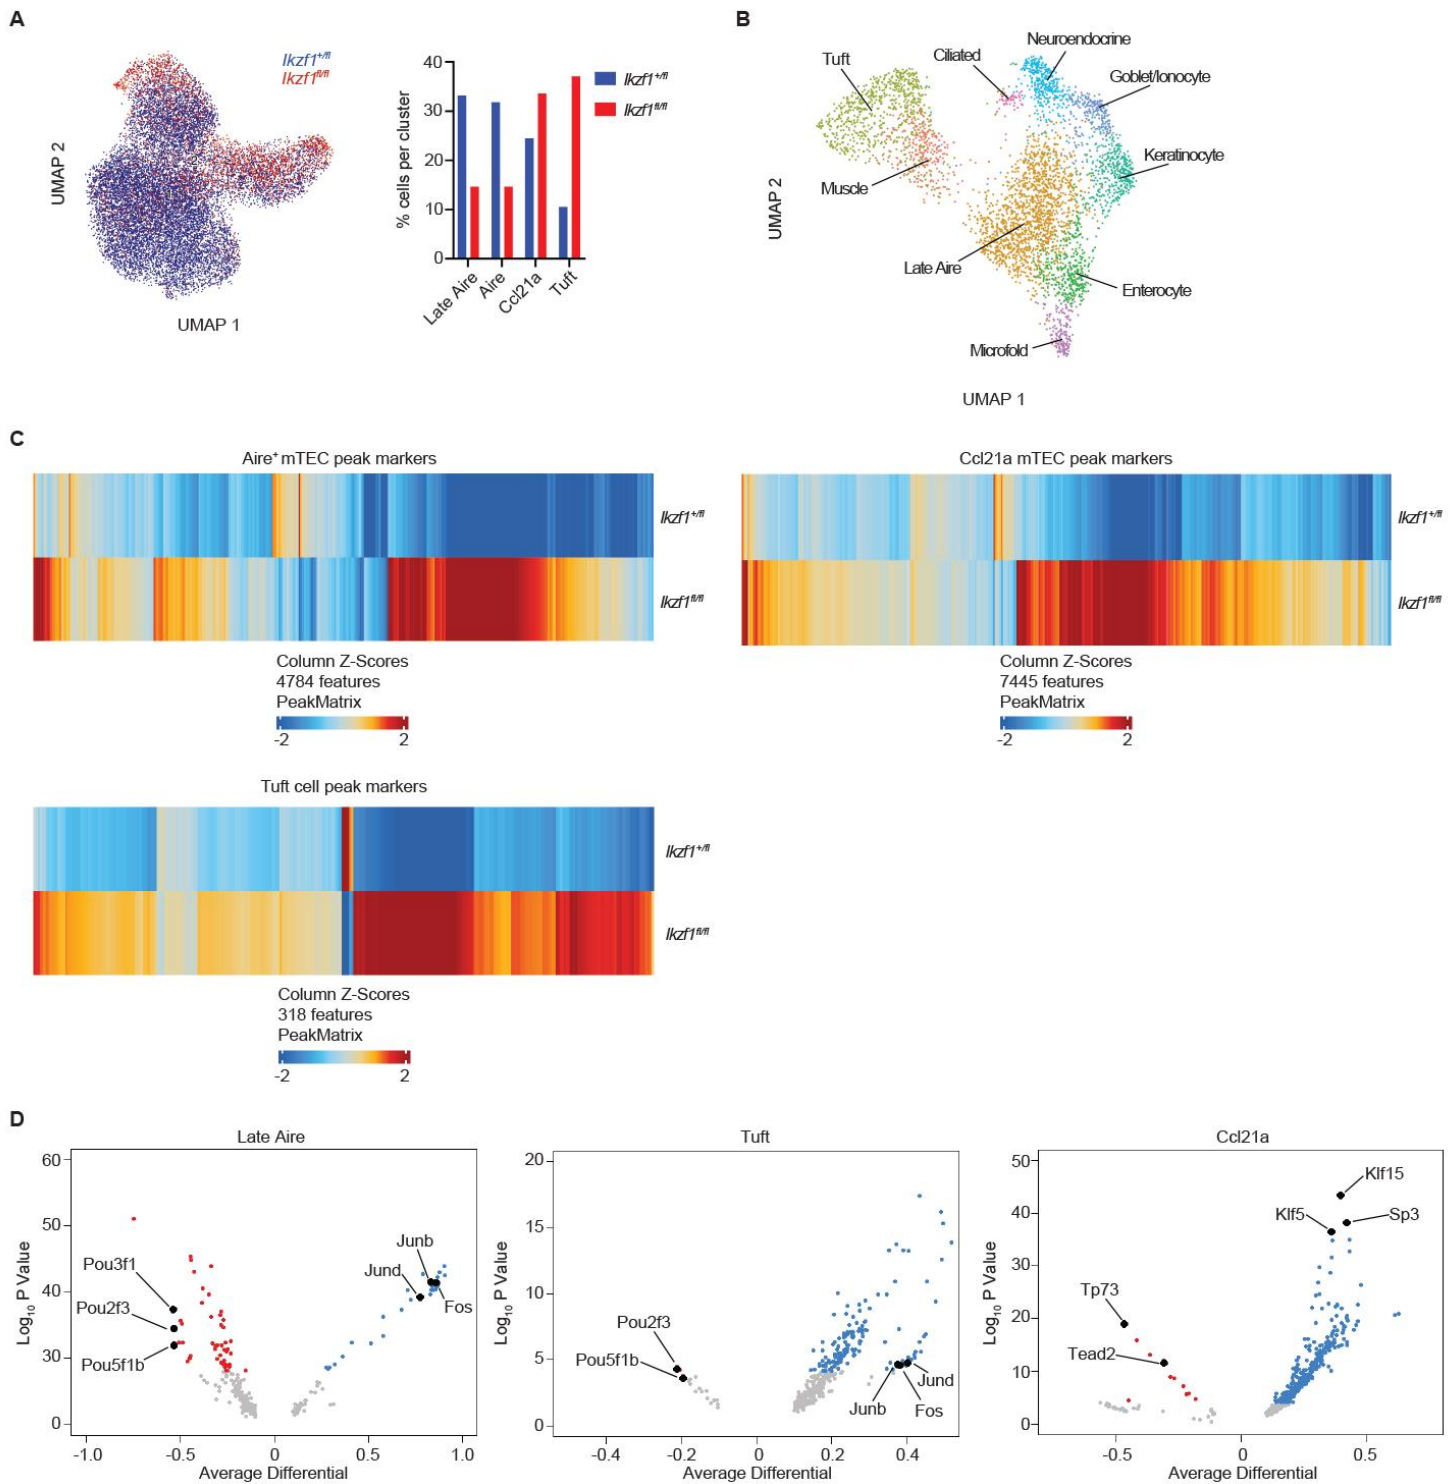

**Fig. S11 - scATAC-seq replicates the cell composition changes seen in scRNA-seq.** (A) UMAP of scATAC-seq clustering for the indicated genotypes. Blue = *Foxn1-Cre/Ikzf1<sup>+fl</sup>* (*Ikzf1<sup>+fl</sup>*) mTECs and Red = *Foxn1-Cre/Ikzf1<sup>fl/fl</sup>* (*Ikzf1<sup>fl/fl</sup>*) mTECs. Bar graph shows percentage of individual mTEC subsets for each genotype. (B) UMAP of mimetic cell populations within Late Aire and tuft scATAC-seq data. (C) Heat map of normalized scATAC-seq fragment density at differential peaks (FDR<0.05) for Aire<sup>+</sup> mTECs, tuft cells, and Ccl21a mTECs. (D) chromVAR motif accessibility volcano plot in Late Aire mTECs, Ccl21a mTECs, and tuft cells. Blue dots show motifs significantly enriched (FDR <0.05) in *Foxn1-Cre/Ikzf1<sup>+fl</sup>* (*Ikzf1<sup>+fl</sup>*) mTECs. Red dots show motifs significantly enriched in *Foxn1-Cre/Ikzf1<sup>fl/fl</sup>* (*Ikzf1<sup>fl/fl</sup>*) mTECs (FDR <0.05).

Figure S12

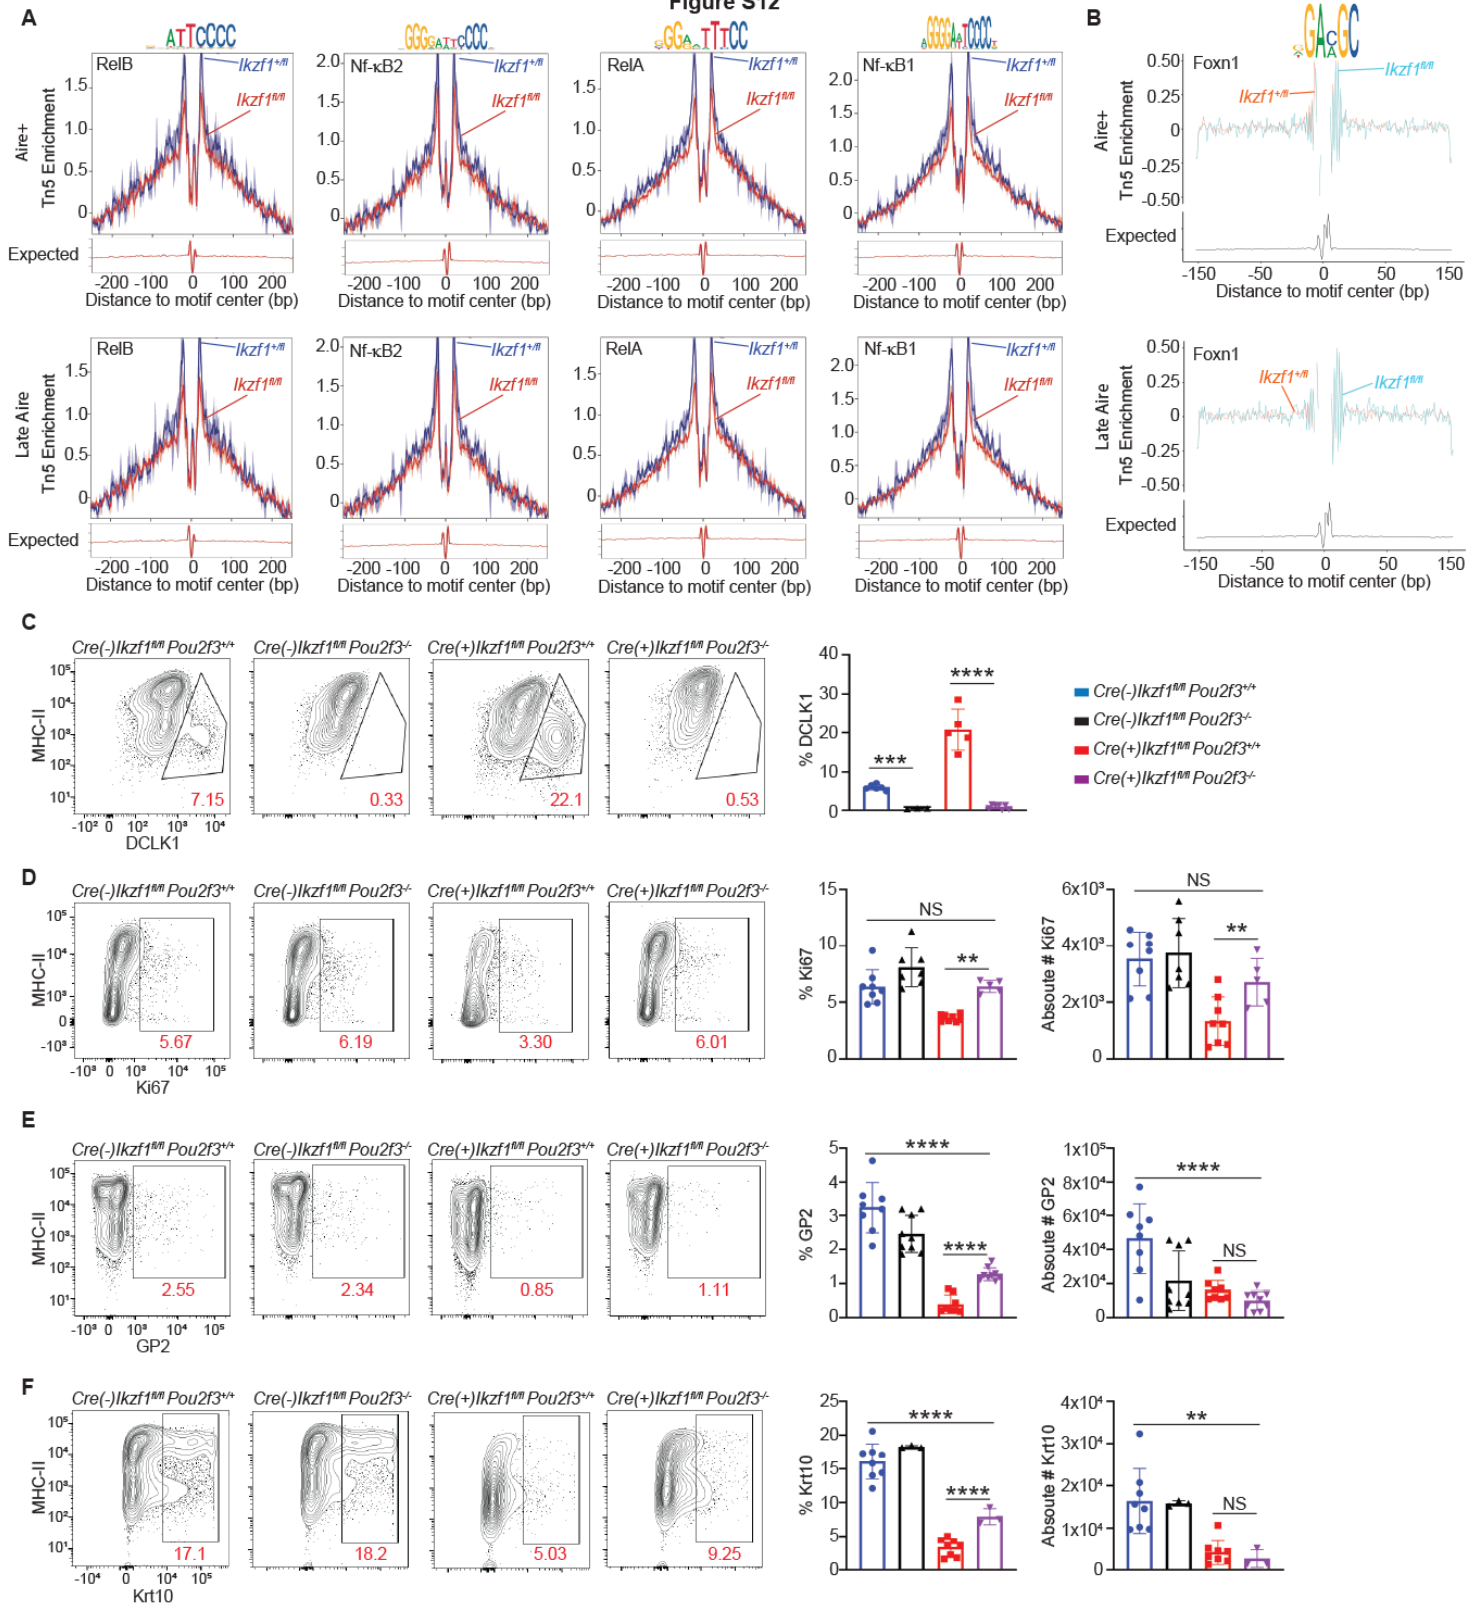

**Fig. S12 - Combined deletion of *Ikzf1/Pou2f3* fails to rescue Aire-dependent mimetic cells. (A-B)** TF footprints with motifs for *Foxn1*-Cre(+)/*Ikzf1*<sup>+/fl</sup> and *Foxn1*-Cre(+)/*Ikzf1*<sup>fl/fl</sup> Aire<sup>+</sup> mTECs and Late Aire mTECs. Expected Tn5 insertion shown below. (A) TF footprints for select NF-κB family members, (B) *Foxn1*. (C-F) Flow cytometry (left) and percentage and absolute number (right) of mTEC populations from *Foxn1*-Cre(-)/*Ikzf1*<sup>fl/fl</sup>/*Pou2f3*<sup>+/+</sup> mice, *Foxn1*-Cre(-)/*Ikzf1*<sup>fl/fl</sup>/*Pou2f3*<sup>-/-</sup> mice, *Foxn1*-Cre(+)/*Ikzf1*<sup>fl/fl</sup>/*Pou2f3*<sup>+/+</sup> mice, and *Foxn1*-Cre(+)/*Ikzf1*<sup>fl/fl</sup>/*Pou2f3*<sup>-/-</sup> mice (n = 3-8 mice per genotype). (C) Staining for CD11c<sup>-</sup>EPCAM<sup>+</sup>CD45<sup>-</sup>



LY51-IA<sup>b</sup>DCLK1<sup>+</sup> tuft cells. **(D)** Staining for Ki67. **(E)** Staining for GP2<sup>+</sup> M cells. **(F)** Staining for KRT10<sup>+</sup> Keratinocytes. **(C-F)** In graphs, the bar corresponds to the mean, with error bars showing +/- SD of values shown, and each data point represents an individual mouse. **(C-F)** Statistical significance was calculated using one-way ANOVA and grouped comparisons were corrected using Tukey's multiple-comparison test, \*\*P<0.01, \*\*\*P<0.001, \*\*\*\*P<0.0001. NS = not significant.

Figure S13

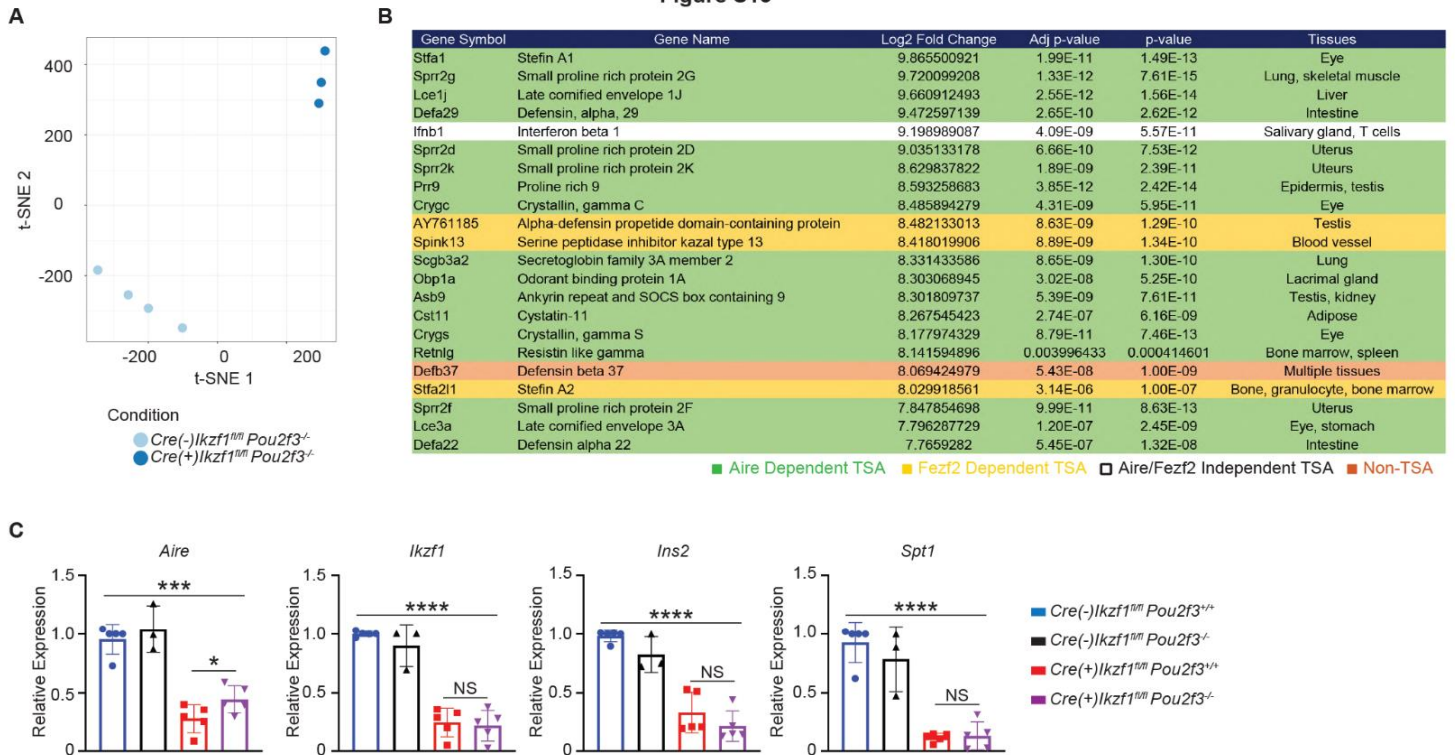

**Fig. S13 - Bulk RNA-seq in MHC-II<sup>high</sup> mTECs with combined *Ikzf1/Pou2f3* deletion. (A) t-distributed stochastic neighbor embedding (t-SNE) plot of bulk RNA-seq samples from MHC-II<sup>high</sup> mTECs of the indicated genotype. Each data point represents MHC-II<sup>high</sup> mTECs isolated from an individual mouse. (B) Table of top 25 genes upregulated genes in MHC-II<sup>high</sup> mTECs in *Foxn1-Cre(-)/Ikzf1<sup>fl/fl</sup>/Pou2f3<sup>-/-</sup>* versus *Foxn1-Cre(+)/Ikzf1<sup>fl/fl</sup>/Pou2f3<sup>-/-</sup>*. (C) qPCR of select target genes. Each data point represents an individual mouse. (C) In graphs, the bar corresponds to the mean, with the error bars showing +/- SD of values shown, and each data point represents an individual mouse. (C) Statistical significance was calculated using one-way ANOVA and grouped comparisons were corrected using Tukey's multiple-comparison test, \*P<0.05, \*\*\*P<0.001, \*\*\*\*P<0.0001. NS = not significant.**

Figure S14

A

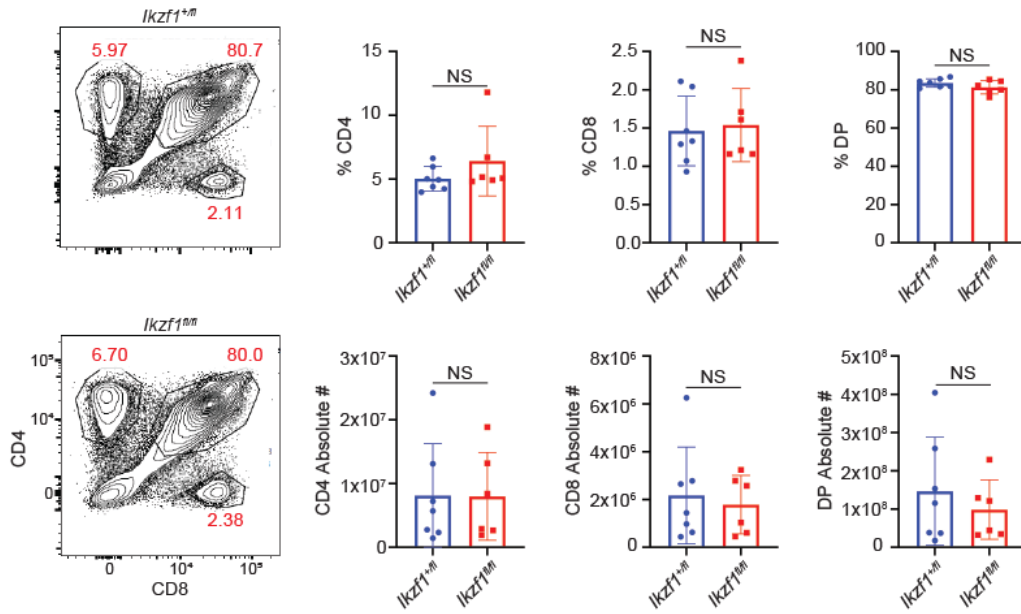

B

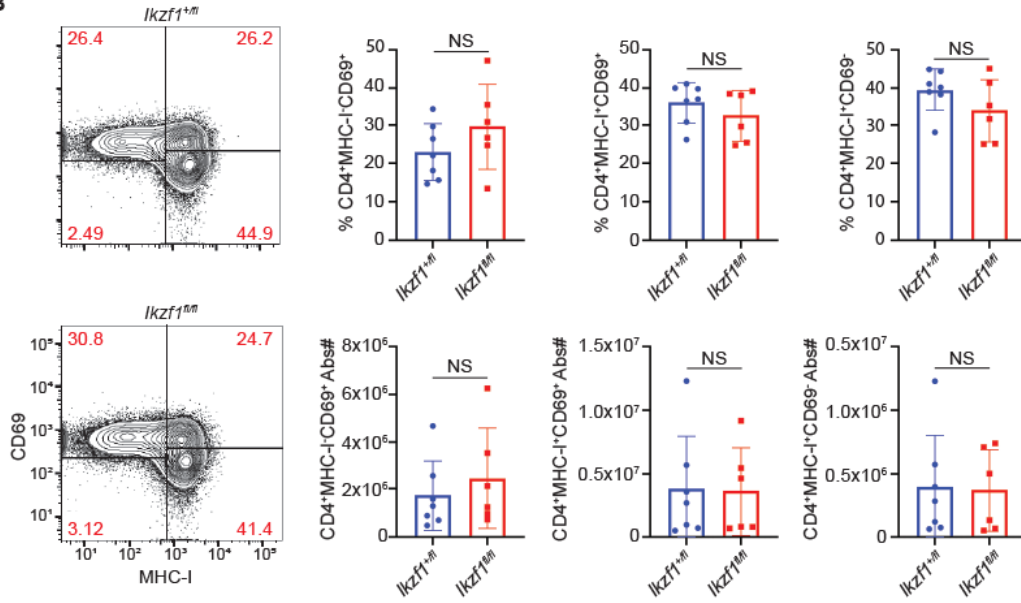

C

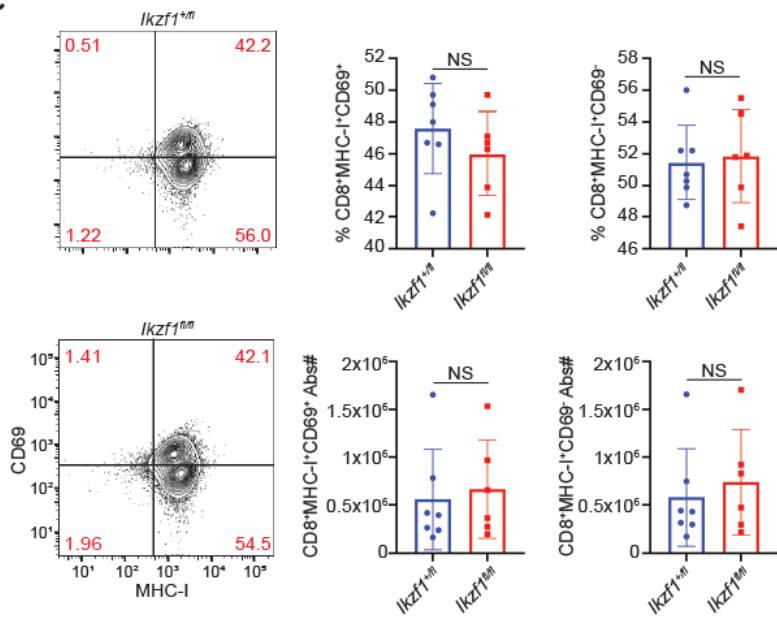

**Fig. S14 – Deletion of *Ikzf1* in mTECs does not alter T cell development.** (A) Flow cytometry plots (left) and counts (right) of thymocyte subsets from *Foxn1-Cre/Ikzf1<sup>+/-</sup>* (*Ikzf1<sup>+/-</sup>*) and *Foxn1-Cre/Ikzf1<sup>fl/fl</sup>* (*Ikzf1<sup>fl/fl</sup>*) mice. (n = 6-7 mice per genotype). (B and C) Flow cytometry plots (left) and counts (right) of CD69<sup>+</sup>/MHC-I<sup>+</sup> semi-mature (SM), CD69<sup>+</sup>/MHC-I<sup>+</sup> mature 1 (M1), and CD69<sup>-</sup>/MHC-I<sup>+</sup> mature 2 (M2), (B) SP CD4<sup>+</sup> T cells and (C) SP CD8<sup>+</sup> T cells. (n = 6-7 mice per genotype). (A-C) In graphs, the bar corresponds to the mean, with error bars showing +/- SD of values shown, and each data point represents an individual mouse. (A-C) Statistical significance was determined using Student's T-test. NS = not significant.

Figure S15

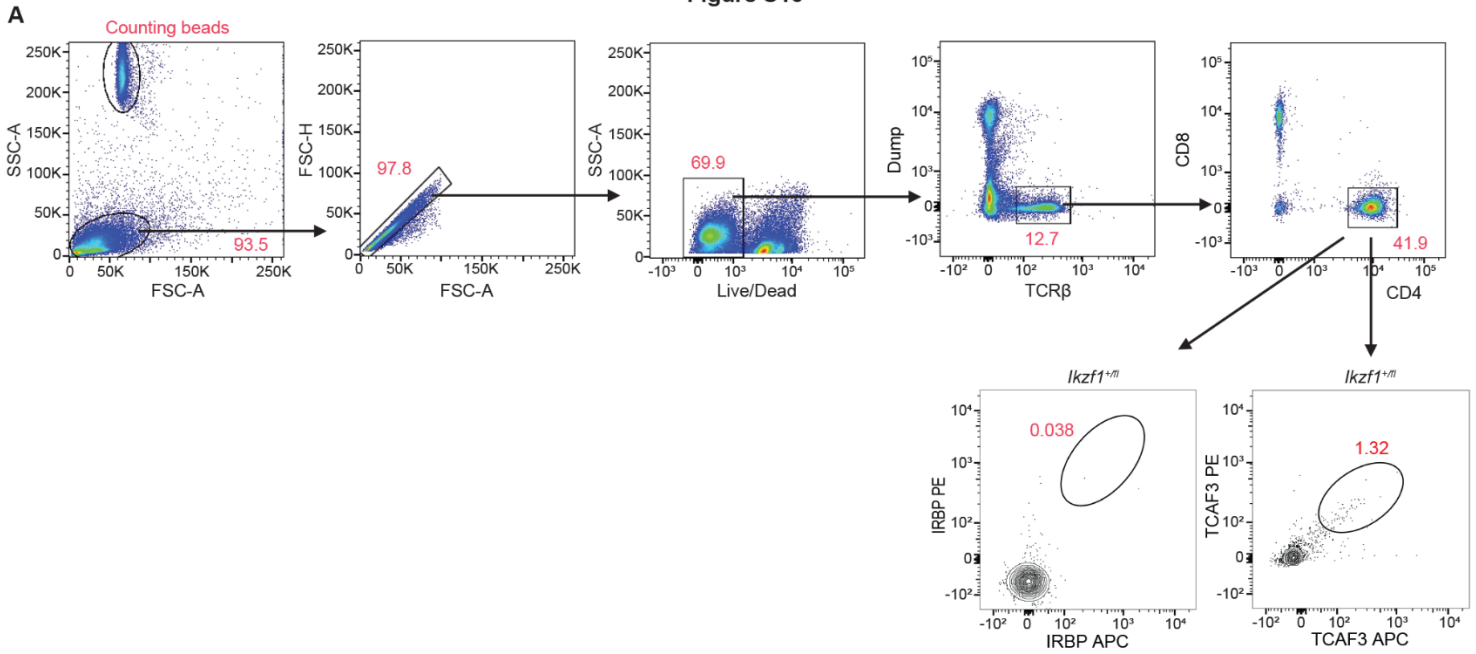

**Fig. S15 – Gating strategy for IRBP and TCAF3 tetramer staining.** (A) Representative gating strategy used for flow cytometry analysis of TCR $\beta$ <sup>+</sup>CD4<sup>+</sup>CD8<sup>-</sup>IRBP<sup>+</sup> and TCR $\beta$ <sup>+</sup>CD4<sup>+</sup>CD8<sup>-</sup>TCAF3<sup>+</sup> T cells from immunized *Foxn1*-Cre(+)/*Ikzf1*<sup>+/-fl</sup> (*Ikzf1*<sup>+/-fl</sup>) mice.

**Supplementary Table 1 – Resource Table.**

| <b>Antibodies</b>                                             | <b>Source</b>                              | <b>Clone/Tetramer Sequence</b> | <b>Used for</b>      |
|---------------------------------------------------------------|--------------------------------------------|--------------------------------|----------------------|
| M2 antibody to Flag                                           | Sigma                                      | F1082                          | Co-IP/Western Blot   |
| HRP-conjugated M2 anti-Flag                                   | Sigma                                      | A8592                          | Co-IP/Western Blot   |
| HRP-conjugated anti-HA                                        | Roche                                      | 12CA5                          | Co-IP/Western Blot   |
| Anti-LaminB                                                   | Abcam                                      | ab65986                        | Co-IP/Western Blot   |
| HRP-conjugated donkey anti-rabbit                             | Jackson ImmunoResearch                     | 711-035-152                    | Co-IP/Western Blot   |
| A647-conjugated Krt10                                         | Abcam                                      | EP1607IHCY                     | Immunofluorescence   |
| A488-conjugated DCLK1                                         | Abcam                                      | EPR6085                        | Immunofluorescence   |
| e660-conjugated Aire                                          | eBiosciences                               | clone 5H12                     | Immunofluorescence   |
| A488-conjugated- Krt5                                         | Abcam                                      | EP1601Y                        | Immunofluorescence   |
| Krt8 (Rabbit polyclonal to KRT8)                              | Abcam                                      | ab59400                        | Immunofluorescence   |
| Rabbit polyclonal RFP antibody pre-adsorbed                   | Rockland                                   | Cat. 600-401-379               | Immunofluorescence   |
| A488-conjugated Goat anti-Rabbit IgG (H+L) secondary antibody | Life Technologies                          | A-11008                        | Immunofluorescence   |
| A647-conjugated goat anti-Rabbit IgG (H+L) secondary antibody | Thermo Scientific                          | A-21244                        | Immunofluorescence   |
| Ikaros rabbit polyclonal targeting the N-terminus             | gift to HS from Stephen T. Smale Lab, UCLA | -                              | Immunofluorescence   |
| Rabbit monoclonal to DCLK1                                    | Abcam                                      | ab109029                       | Immunohistochemistry |
| Rabbit polyclonal to Biotin                                   | Abcam                                      | ab1227                         | Immunohistochemistry |
| LIVE/DEAD Fixable Blue Dead Cell Stain Kit                    | Thermo Fisher Scientific                   | Cat. L23105                    | Flow cytometry       |
| PerCPCy5.5-conjugated CD8                                     | BioLegend                                  | SK1                            | Flow cytometry       |
| PerCPCy5.5-conjugated CD44                                    | Tonbo Biosciences                          | IM7                            | Flow cytometry       |
| PerCP-conjugated CD45                                         | Invitrogen                                 | 30-F11                         | Flow cytometry       |
| BUV737-conjugated CD8a                                        | BD Biosciences                             | 53-6.7                         | Flow cytometry       |
| Pacific Blue-conjugated CD19                                  | BioLegend                                  | 6D5                            | Flow cytometry       |
| Alexa Fluor e450-conjugated CD11B                             | Thermo Fisher Scientific                   | M1/70                          | Flow cytometry       |
| BV421-conjugated F4/80                                        | BioLegend                                  | BM8                            | Flow cytometry       |
| BV421-conjugated CD11c                                        | BioLegend                                  | N418                           | Flow cytometry       |
| BUV737-conjugated CD11c                                       | BD Biosciences                             | HL3                            | Flow cytometry       |
| BV605-conjugated CD45                                         | BD Biosciences                             | 30 F11                         | Flow cytometry       |

|                                                  |                          |                  |                |
|--------------------------------------------------|--------------------------|------------------|----------------|
| Alexa Fluor e450-conjugated MHC-II I-Ab          | Thermo Fisher Scientific | AF6-120.1        | Flow cytometry |
| BV605-conjugated CD8                             | BD Biosciences           | SK1              | Flow cytometry |
| PE-Cy7-conjugated CD4                            | Tonbo Biosciences        | RM4-5            | Flow cytometry |
| PE-Cy7-conjugated CD45                           | Invitrogen               | 30-F11           | Flow cytometry |
| PECy7-conjugated CD11c                           | Tonbo Biosciences        | N418             | Flow cytometry |
| PE-conjugated CD62L                              | Tonbo Biosciences        | MEL-14           | Flow cytometry |
| PE-conjugated CD44                               | BioLegend                | IM7              | Flow cytometry |
| PE-conjugated Ly51                               | BioLegend                | 6C3              | Flow cytometry |
| PE-conjugated FOXP3                              | eBioscience              | FJK-16s          | Flow cytometry |
| PE-conjugated MHCI                               | eBioscience              | AF6-88.5.5.3     | Flow cytometry |
| PE-conjugated RORg                               | eBioscience              | B2D              | Flow cytometry |
| FITC-conjugated Foxp3                            | Invitrogen               | FJK-16s          | Flow cytometry |
| FITC-conjugated Ly51                             | BioLegend                | 6C3              | Flow cytometry |
| FITC-conjugated CD69                             | Thermo Fisher Scientific | CH/4             | Flow cytometry |
| A488-conjugated EOMES                            | Invitrogen               | Dan11mag         | Flow cytometry |
| A488-conjugated Aire                             | Thermo Fisher Scientific | 5H12             | Flow cytometry |
| A488-conjugated DCLK1                            | Abcam                    | EPR6085          | Flow cytometry |
| A488-conjugated PLZF                             | eBioscience              | Mags.21F7        | Flow cytometry |
| APC-conjugated CD25                              | Tonbo                    | PC61.5           | Flow cytometry |
| APC-conjugated MHC-II I-Ab                       | eBioscience              | AF6-120.1        | Flow cytometry |
| APC-conjugated Ikaros                            | BioLegend                | 2A9/Ikaros       | Flow cytometry |
| A647-conjugated KRT10                            | Abcam                    | EP1607IHCY       | Flow cytometry |
| Alexa Fluor e660-conjugated AIRE                 | eBioscience              | 5H12             | Flow cytometry |
| APCCy7-conjugated EPCAM                          | BioLegend                | G8.8             | Flow cytometry |
| APCe780-conjugated TCRb                          | eBioscience              | H57-597          | Flow cytometry |
| Mouse CCL21/6Ckine Antibody                      | R&D Systems              | MAB457           | Flow cytometry |
| Rabbit polyclonal RFP antibody pre-adsorbed      | Rockland                 | Cat. 600-401-379 | Flow cytometry |
| PE-conjugated L1CAM                              | Bio-Techne               | 555              | Flow cytometry |
| PE-conjugated Glycoprotein 2                     | MBL Life Science         | 2F11-C8          | Flow cytometry |
| Alexa Fluor 647-conjugated Ki67                  | BD Pharmingen            | B56              | Flow cytometry |
| Alexa Fluor A488-conjugated UEA1                 | VWR                      | Cat. 10360-710   | Flow cytometry |
| Donkey anti-goat IgG (H+L) secondary Antibody PE | Invitrogen               | Cat. PA1-29953   | Flow cytometry |

|                                 |                       |               |                   |
|---------------------------------|-----------------------|---------------|-------------------|
| PE-labeled tetramer for IRBP    | NIH Tetramer Facility | QTWEGSGVLPCVG | Tetramer staining |
| APC-labeled tetramer for IRBP   | NIH Tetramer Facility | QTWEGSGVLPCVG | Tetramer staining |
| PE-labeled tetramer for TCAF3   | NIH Tetramer Facility | THYKAPWGELATD | Tetramer staining |
| APC-labeled tetramer for TCAF3  | NIH Tetramer Facility | THYKAPWGELATD | Tetramer staining |
| BV421-labeled tetramer for CD1d | NIH Tetramer Facility | PBS-57        | Tetramer staining |
